# Supplementary material for: Intrinsic group behaviour II: On the dependence of triad spatial dynamics on social and personal features; and on the effect of social interaction on small group dynamics
Source: PubMed Central journal article supplement (PMC6890182; doi:10.1371/journal.pone.0225704), 2019-12-03
Supplement: pone.0225704.s009.pdf [file pone.0225704.s009.pdf]

# Statistical analysis of overall probability distributions

## Purpose

Table 1 provides a statistical analysis of the overall probability distributions for the purpose categories in triads.

Table 1: Statistical analysis of the overall probability distributions for the purpose categories in triads. Lengths in millimetres, times in seconds.

| Purpose       | $N^k$ | $V$                             | $r$                            | $x$                             | $y$                            |
|---------------|-------|---------------------------------|--------------------------------|---------------------------------|--------------------------------|
| Leisure       | 26120 | $998 \pm 1.3$ ( $\sigma=206$ )  | $594 \pm 1.1$ ( $\sigma=172$ ) | $914 \pm 2.2$ ( $\sigma=360$ )  | $688 \pm 3$ ( $\sigma=479$ )   |
| Work          | 3375  | $1191 \pm 3.6$ ( $\sigma=211$ ) | $599 \pm 2.7$ ( $\sigma=155$ ) | $1112 \pm 5.8$ ( $\sigma=337$ ) | $596 \pm 7.2$ ( $\sigma=417$ ) |
| $F_{1,29493}$ |       | 2590                            | 3.31                           | 922                             | 115                            |
| $p$           |       | $< 10^{-8}$                     | 0.0687                         | $< 10^{-8}$                     | $< 10^{-8}$                    |
| $R^2$         |       | 0.0809                          | 0.000112                       | 0.0303                          | 0.00388                        |
| $\delta$      |       | 0.932                           | 0.0333                         | 0.555                           | 0.196                          |

## Relation

Table 2 provides a statistical analysis of the overall probability distributions for the relation categories in triads.

Table 2: Statistical analysis of the overall probability distributions for the relation categories in triads. Lengths in millimetres, times in seconds.

| Relation      | $N^k$ | $V$                             | $r$                            | $x$                             | $y$                            |
|---------------|-------|---------------------------------|--------------------------------|---------------------------------|--------------------------------|
| Colleagues    | 3370  | $1189 \pm 3.6$ ( $\sigma=210$ ) | $602 \pm 2.7$ ( $\sigma=156$ ) | $1108 \pm 5.9$ ( $\sigma=340$ ) | $606 \pm 7.3$ ( $\sigma=422$ ) |
| Families      | 15599 | $981 \pm 1.6$ ( $\sigma=206$ )  | $619 \pm 1.5$ ( $\sigma=188$ ) | $876 \pm 2.9$ ( $\sigma=366$ )  | $750 \pm 4.1$ ( $\sigma=518$ ) |
| Friends       | 10526 | $1024 \pm 2$ ( $\sigma=204$ )   | $555 \pm 1.3$ ( $\sigma=137$ ) | $972 \pm 3.3$ ( $\sigma=343$ )  | $594 \pm 3.9$ ( $\sigma=396$ ) |
| $F_{2,29492}$ |       | 1410                            | 460                            | 673                             | 399                            |
| $p$           |       | $< 10^{-8}$                     | $< 10^{-8}$                    | $< 10^{-8}$                     | $< 10^{-8}$                    |
| $R^2$         |       | 0.0875                          | 0.0302                         | 0.0436                          | 0.0263                         |
| $\delta$      |       | 1                               | 0.378                          | 0.641                           | 0.331                          |

## Gender

Table 3 provides a statistical analysis of the overall probability distributions for the gender categories in triads.

## Age

Table 4 provides a statistical analysis of the overall probability distributions for the minimum age ranges in triads.

Table 3: Statistical analysis of the overall probability distributions for the gender categories in triads. Lengths in millimetres, times in seconds.

| Gender        | $N^k$ | $V$                             | $r$                            | $x$                             | $y$                            |
|---------------|-------|---------------------------------|--------------------------------|---------------------------------|--------------------------------|
| Three females | 7826  | 1013 $\pm$ 2.3 ( $\sigma=200$ ) | 557 $\pm$ 1.7 ( $\sigma=147$ ) | 965 $\pm$ 3.9 ( $\sigma=346$ )  | 607 $\pm$ 4.7 ( $\sigma=418$ ) |
| Two females   | 9689  | 976 $\pm$ 2 ( $\sigma=199$ )    | 601 $\pm$ 1.8 ( $\sigma=177$ ) | 886 $\pm$ 3.6 ( $\sigma=354$ )  | 705 $\pm$ 5 ( $\sigma=494$ )   |
| Two males     | 6460  | 998 $\pm$ 2.6 ( $\sigma=207$ )  | 631 $\pm$ 2.3 ( $\sigma=183$ ) | 900 $\pm$ 4.8 ( $\sigma=383$ )  | 770 $\pm$ 6.2 ( $\sigma=499$ ) |
| Three males   | 5520  | 1134 $\pm$ 3.2 ( $\sigma=234$ ) | 593 $\pm$ 2.2 ( $\sigma=163$ ) | 1028 $\pm$ 4.8 ( $\sigma=355$ ) | 622 $\pm$ 6.1 ( $\sigma=455$ ) |
| $F_{3,29491}$ |       | 730                             | 234                            | 223                             | 179                            |
| $p$           |       | $< 10^{-8}$                     | $< 10^{-8}$                    | $< 10^{-8}$                     | $< 10^{-8}$                    |
| $R^2$         |       | 0.0692                          | 0.0233                         | 0.0222                          | 0.0178                         |
| $\delta$      |       | 0.747                           | 0.45                           | 0.402                           | 0.355                          |

Table 4: Statistical analysis of the overall probability distributions for the minimum age ranges in triads. Lengths in millimetres, times in seconds.

| Minimum age     | $N^k$ | $V$                             | $r$                            | $x$                             | $y$                            |
|-----------------|-------|---------------------------------|--------------------------------|---------------------------------|--------------------------------|
| 0-7 years       | 4330  | 962 $\pm$ 3.2 ( $\sigma=210$ )  | 614 $\pm$ 3 ( $\sigma=200$ )   | 870 $\pm$ 5.6 ( $\sigma=366$ )  | 732 $\pm$ 8 ( $\sigma=527$ )   |
| 8-19 years      | 11873 | 1010 $\pm$ 1.9 ( $\sigma=207$ ) | 581 $\pm$ 1.5 ( $\sigma=167$ ) | 899 $\pm$ 3.2 ( $\sigma=352$ )  | 673 $\pm$ 4.3 ( $\sigma=468$ ) |
| 20-29 years     | 5663  | 1030 $\pm$ 2.7 ( $\sigma=204$ ) | 575 $\pm$ 2 ( $\sigma=151$ )   | 972 $\pm$ 4.5 ( $\sigma=338$ )  | 637 $\pm$ 5.7 ( $\sigma=425$ ) |
| 30-39 years     | 2497  | 1062 $\pm$ 4.5 ( $\sigma=223$ ) | 623 $\pm$ 3.6 ( $\sigma=179$ ) | 978 $\pm$ 7.6 ( $\sigma=379$ )  | 718 $\pm$ 10 ( $\sigma=511$ )  |
| 40-49 years     | 3226  | 1086 $\pm$ 4.2 ( $\sigma=238$ ) | 610 $\pm$ 2.8 ( $\sigma=157$ ) | 1010 $\pm$ 6.5 ( $\sigma=371$ ) | 673 $\pm$ 7.8 ( $\sigma=442$ ) |
| 50-59 years     | 1253  | 1059 $\pm$ 6 ( $\sigma=214$ )   | 598 $\pm$ 4.3 ( $\sigma=151$ ) | 1054 $\pm$ 10 ( $\sigma=360$ )  | 572 $\pm$ 12 ( $\sigma=437$ )  |
| 60-69 years     | 222   | 944 $\pm$ 19 ( $\sigma=285$ )   | 675 $\pm$ 9.5 ( $\sigma=141$ ) | 1311 $\pm$ 25 ( $\sigma=377$ )  | 585 $\pm$ 33 ( $\sigma=496$ )  |
| $\geq 70$ years | 431   | 931 $\pm$ 7.9 ( $\sigma=165$ )  | 690 $\pm$ 9.5 ( $\sigma=197$ ) | 854 $\pm$ 19 ( $\sigma=400$ )   | 969 $\pm$ 26 ( $\sigma=540$ )  |
| $F_{7,29487}$   |       | 130                             | 70.2                           | 130                             | 51.3                           |
| $p$             |       | $< 10^{-8}$                     | $< 10^{-8}$                    | $< 10^{-8}$                     | $< 10^{-8}$                    |
| $R^2$           |       | 0.0299                          | 0.0164                         | 0.03                            | 0.012                          |
| $\delta$        |       | 0.668                           | 0.742                          | 1.16                            | 0.854                          |

## Height

Table 5 provides a statistical analysis of the overall probability distributions for the minimum height ranges in triads.

Table 5: Statistical analysis of the overall probability distributions for the minimum height ranges in triads. Lengths in millimetres, times in seconds.

| Minimum height | $N^k$ | $V$                             | $r$                            | $x$                             | $y$                            |
|----------------|-------|---------------------------------|--------------------------------|---------------------------------|--------------------------------|
| < 140 cm       | 4479  | $990 \pm 3.3$ ( $\sigma=219$ )  | $641 \pm 3$ ( $\sigma=203$ )   | $881 \pm 5.9$ ( $\sigma=393$ )  | $767 \pm 8$ ( $\sigma=536$ )   |
| 140-150 cm     | 1897  | $1032 \pm 4.9$ ( $\sigma=212$ ) | $595 \pm 4.2$ ( $\sigma=181$ ) | $871 \pm 8.2$ ( $\sigma=356$ )  | $769 \pm 12$ ( $\sigma=520$ )  |
| 150-160 cm     | 10195 | $991 \pm 2$ ( $\sigma=199$ )    | $588 \pm 1.6$ ( $\sigma=157$ ) | $918 \pm 3.5$ ( $\sigma=351$ )  | $673 \pm 4.5$ ( $\sigma=456$ ) |
| 160-170 cm     | 10153 | $1033 \pm 2.1$ ( $\sigma=214$ ) | $581 \pm 1.6$ ( $\sigma=164$ ) | $962 \pm 3.4$ ( $\sigma=342$ )  | $645 \pm 4.5$ ( $\sigma=452$ ) |
| 170-180 cm     | 2741  | $1117 \pm 4.6$ ( $\sigma=241$ ) | $594 \pm 3.1$ ( $\sigma=161$ ) | $1052 \pm 7.6$ ( $\sigma=396$ ) | $607 \pm 8.5$ ( $\sigma=443$ ) |
| $F_{5,29489}$  |       | 186                             | 87.1                           | 107                             | 68.9                           |
| $p$            |       | $< 10^{-8}$                     | $< 10^{-8}$                    | $< 10^{-8}$                     | $< 10^{-8}$                    |
| $R^2$          |       | 0.0305                          | 0.0145                         | 0.0178                          | 0.0115                         |
| $\delta$       |       | 1.3                             | 0.904                          | 0.546                           | 0.325                          |
