# Supplementary material for: Intrinsic group behaviour II: On the dependence of triad spatial dynamics on social and personal features; and on the effect of social interaction on small group dynamics
Source: PLoS One. 2019 Dec 3;14(12):e0225704. doi: 10.1371/journal.pone.0225704 (PMC6890182; doi:10.1371/journal.pone.0225704)
Supplement: S1 Annex — (ZIP) [file pone.0225704.s005.zip]

Archive with 7 entries (6 files):
- annex_1/
- annex_1/interaction_coding.xlsx
- annex_1/interaction_coding.pdf
- annex_1/interaction_criteria.pdf
- annex_1/readme.pdf
- annex_1/3_people_instructions.pdf
- annex_1/3_people_coding.xlsx
