# Supplementary material for: Intrinsic group behaviour II: On the dependence of triad spatial dynamics on social and personal features; and on the effect of social interaction on small group dynamics
Source: PLoS One. 2019 Dec 3;14(12):e0225704. doi: 10.1371/journal.pone.0225704 (PMC6890182; doi:10.1371/journal.pone.0225704)
Supplement: S1 Annex — (ZIP) [file pone.0225704.s005.zip › annex_1/3_people_coding.xlsx]

## Sheet: 20130109
歩行者ID (pedestrian ID)	Gサイズ (group size)	同行ID (partner ID)	相手サイズ (number of interaction partners)	関係(relation)： 0:判別不可能 1：恋人2：同僚 3：家族 4：友人	年齢 (Age)	性別(gender)： 0：女性 1：男性	用事(purpose)： 0：遊び 1：仕事	詳しい説明 (detailed explanation)	メモ (notes)
10014300	2	10014200
10014200	2	10014300
10050200	2	10045600
10045600	2	10050200
10054101	2	10054100
10054100	2	10054101
10064801	2	10064800
10064800	2	10064801
10080101	2	10075700
10075700	2	10080101
10170700	2	10170400
10170400	2	10170700
10244601	3	10251300, 10251101	1	2	30	1	1	外国人、黒スーツにコート着用
10251300	3	10244601, 10251101	2	2	30	1	1	スーツにコート着用、鞄
10251101	3	10244601, 10251300	1	2	60	1	1	スーツにコート着用、グレーマフラー、眼鏡、両手ポケットに
10245500	2	10245600
10245600	2	10245500
10260200	3	10255300, 10260900	2	2	50	1	1	スーツ、グレー系ネクタイ、
10255300	3	10260200, 10260900	2	2	50	1	1	スーツ、左手ポケット、水色系ネクタイ
10260900	3	10260200, 10255300	2	2	40	1	1	スーツ、眼鏡、鞄
10271000	2	10271200
10271200	2	10271000
10270500	3	10265300, 10271400	2	4	70	1	0	ニット帽、眼鏡、背で腕組み
10265300	3	10270500, 10271400	2	4	60	0	0	キャスター付きかばん、
10271400	3	10270500, 10265300	2	4	60	0	0	キャスター付きかばん、帽子、ロングコート着用
10305700	2	10310000
10310000	2	10305700
10312900	3	10312800, 10312700	2	2	60	1	1	眼鏡、挨拶
10312800	3	10312900, 10312700	2	2	50	1	1	スーツにロングコート着用
10312700	3	10312900, 10312800	2	2	40	1	1	左腕にあるコートを着用する、鞄、
10310700	1	0
10314801	2	10314700
10314700	2	10314801
10331800	2	10331900
10331900	2	10331800
10340100	2	10340800
10340800	2	10340100
10392400	3	10395000, 10395100	2	2	40	1	1	後ろポケット辺りに鞄
10395000	3	10392400, 10395100	2	2	30	1	1	白シャツに黒セーター
10395100	3	10392400, 10395000	2	2	30	1	1	背で腕組み
10394302	2	10394300
10394300	2	10394302
10442401	4	10442302, 10442100, 10441900
10442302	4	10442401, 10442100, 10441900
10442100	4	10442401, 10442302, 10441900
10441900	4	10442401, 10442302, 10442100
10443700	2	10442300
10442300	2	10443700
10453600	2	10454600
10454600	2	10453600
10485300	3	10485400, 10485100	1	4	40	1	0	黒色パーカー
10485400	3	10485300, 10485100	2	4	40	1	0	赤シャツ、赤帽
10485100	3	10485300, 10485400	1	4	60	1	0	外国人 グレーのジャケット、
10514200	2	10522700
10522700	2	10514200
10523700	2	10523601
10523601	2	10523700
10550400	2	10545500
10545500	2	10550400
10564700	2	10562700
10562700	2	10564700
10560700	2	10560800
10560800	2	10560700
10561301	7	10561100, 10561300, 10561101, 10561801, 10561800, 10561302
10561100	7	10561301, 10561300, 10561101, 10561801, 10561800, 10561302
10561300	7	10561301, 10561100, 10561101, 10561801, 10561800, 10561302
10561101	7	10561301, 10561100, 10561300, 10561801, 10561800, 10561302
10561801	7	10561301, 10561100, 10561300, 10561101, 10561800, 10561302
10561800	7	10561301, 10561100, 10561300, 10561101, 10561801, 10561302
10561302	7	10561301, 10561100, 10561300, 10561101, 10561801, 10561800
10564400	2	10562901
10562901	2	10564400
10574900	2	10575000
10575000	2	10574900
10585900	2	10585601
10585601	2	10585900
11594200	2	11592800
11592800	2	11594200
12002200	2	12001901
12001901	2	12002200
12012200	2	12020800
12020800	2	12012200
12015900	2	12015800
12015800	2	12015900
12004401	2	12014401
12014401	2	12004401
12021200	2	12021400
12021400	2	12021200
12023301	2	12023300
12023300	2	12023301
12033300	2	12031700
12031700	2	12033300
12032100	2	12033500
12033500	2	12032100
12031100	2	12031000
12031000	2	12031100
12041501	2	12042000
12042000	2	12041501
12055700	2	12060501
12060501	2	12055700
12062500	4	12064100, 12062300, 12063401
12064100	4	12062500, 12062300, 12063401
12062300	4	12062500, 12064100, 12063401
12063401	4	12062500, 12064100, 12062300
12065500	2	12065400
12065400	2	12065500
12070000	2	12071501
12071501	2	12070000
12084201	2	12083400
12083400	2	12084201
12081600	2	12094500
12094500	2	12081600
12101300	2	12101500
12101500	2	12101300
12095400	3	12095200, 12095300	2	2	50	0	1	黒白ボーダーセーター
12095200	3	12095400, 12095300	2	2	50	0	1	ピンク色セーター、眼鏡
12095300	3	12095400, 12095200	2	2	50	0	1	グレー系パンツ、ショートカット
12102000	2	12102100
12102100	2	12102000
12104001	2	no ID
no ID	2	12104001
12101800	3	12110102, 12110000	1	2	50	1	1	眼鏡、鞄、茶系コート
12110102	3	12101800, 12110000	0	2	40	0	1	スカートに黒コート、鞄
12110000	3	12101800, 12110102	1	2	40	1	1	鞄、黒系スーツにコート
12120800	2	12120600
12120600	2	12120800
12123301	2	12121000
12121000	2	12123301
12130600	2	12130400
12130400	2	12130600
12124500	2	12123001
12123001	2	12124500
12150100	2	12150201
12150201	2	12150100
12150002	2	12150101
12150101	2	12150002
12153600	4	12154000, 12153700, 12153401
12154000	4	12153600, 12153700, 12153401
12153700	4	12153600, 12154000, 12153401
12153401	4	12153600, 12154000, 12153700
12161401	2	12161500
12161500	2	12161401
12162600	2	12163401
12163401	2	12162600
12170900	3	12170700, no ID	1	3	40	1	1	父、白ダウンコート
12170700	3	12170900, no ID	1	3	30	0	1	母、黒ダウンコート、子供と手つなぎ
no ID	3	12170900, 12170700	2	3	5	1	1	子供、黒色上下、母と手つなぎ
12172300	2	12171801
12171801	2	12172300
12164901	2	12165100
12165100	2	12164901
12172800	3	12173901, 12174100	2	2	50	0	1	グレー系パンツ、ショートカット
12173901	3	12172800, 12174100	2	2	50	0	1	ピンク色セーター、眼鏡
12174100	3	12172800, 12173901	2	2	50	0	1	黒色ボーダーセーター
12190702	2	12190701
12190701	2	12190702
12191200	4	12191901, 12190900, 12184200
12191901	4	12191200, 12190900, 12184200
12190900	4	12191200, 12191901, 12184200
12184200	4	12191200, 12191901, 12190900
12191701	2	12191400
12191400	2	12191701
12192402	2	no ID
no ID	2	12192402
12192602	2	12192703
12192703	2	12192602
12193601	2	12193001
12193001	2	12193601
12192601	2	12191402
12191402	2	12192601
12192902	2	12192705
12192705	2	12192902
12185100	2	12194101
12194101	2	12185100
12192401	2	12192201
12192201	2	12192401
12195901	4	12195300, 12195500, 12195301
12195300	4	12195901, 12195500, 12195301
12195500	4	12195901, 12195300, 12195301
12195301	4	12195901, 12195300, 12195500
12195701	2	12185700
12185700	2	12195701
12201700	2	12201500
12201500	2	12201700
12210801	2	12210901
12210901	2	12210801
12210202	3	12210501, 12205900	1	2	40	1	1	水色作業着にベージュチノパン
12210501	3	12210202, 12205900	1	2	50	1	1	茶系ベストにベージュパンツ
12205900	3	12210202, 12210501	0	2	40	0	1	ベージュ色カーディガン
12213302	2	12214300
12214300	2	12213302
12215501	2	12220000
12220000	2	12215501
12221401	2	12221100
12221100	2	12221401
12221301	2	12221102
12221102	2	12221301
12214100	2	12203400
12203400	2	12214100
12221700	3	12222000, 12223401	1	2	40	1	1	眼鏡、黒セーター、キャメル色革靴
12222000	3	12221700, 12223401	1	2	40	1	1	茶系スーツ、前で腕組み
12223401	3	12221700, 12222000	0	2	50	1	1	白髪、両手をパンツポケットに
12224100	4	12223800, 12224200, 12224300
12223800	4	12224100, 12224200, 12224300
12224200	4	12224100, 12223800, 12224300
12224300	4	12224100, 12223800, 12224200
12215101	2	12230600
12230600	2	12215101
12231300	2	12232300
12232300	2	12231300
12235600	2	12235701
12235701	2	12235600
12232700	2	12231800
12231800	2	12232700
12242900	2	12234800
12234800	2	12242900
12243800	2	12243700
12243700	2	12243800
12244300	2	12244900
12244900	2	12244300
12270301	2	12270501
12270501	2	12270301
12283601	3	12283200, 12283400	0	2	50	1	1	白髪混じり、眼鏡、グレー系鞄
12283200	3	12283601, 12283400	1	2	40	1	1	眼鏡、 ショルダーバッグ
12283400	3	12283601, 12283200	1	2	40	1	1	鞄と水色紙袋
12275202	4	12274100, 12275800, no ID
12274100	4	12275202, 12275800, no ID
12275800	4	12275202, 12274100, no ID
no ID	4	12275202, 12274100, 12275800
12290800	2	12290700
12290700	2	12290800
12295800	2	12295700
12295700	2	12295800
12295100	3	12292400, 12295201	2	3	4	1	0	子供 黒色ダウンコート
12292400	3	12295100, 12295201	2	3	30	1	0	父 黒色ダウンコート
12295201	3	12295100, 12292400	2	3	30	0	0	母 白パンツにグレー色ブーツ
12310400	4	12305701, 12311400, 12312000
12305701	4	12310400, 12311400, 12312000
12311400	4	12310400, 12305701, 12312000
12312000	4	12310400, 12305701, 12311400
12315101	2	12315200
12315200	2	12315101
12323102	2	12323100
12323100	2	12323102
12321700	2	12322401
12322401	2	12321700
12334300	2	12334401
12334401	2	12334300
12335401	2	12335501
12335501	2	12335401
12341100	3	12343600, 12344900	0	2	50	1	1	眼鏡、背で腕組み、スーツに紺色系ジャンバー
12343600	3	12341100, 12344900	1	2	50	1	1	スーツの中に茶系ベスト着用
12344900	3	12341100, 12343600	1	2	50	1	1	手に鞄
12342300	3	12342400, 12342301	2	2	40	1	1	グレー系コート、黒色手提げ鞄
12342400	3	12342300, 12342301	2	2	30	1	1	ベージュ色コートにリュックサック
12342301	3	12342300, 12342400	2	2	40	1	1	黒色フード付きコート
12350400	2	no ID
no ID	2	12350400
12350000	3	12352001, 12352600	1	4	70	0	0	ロングコート、帽子、キャスター付き鞄
12352001	3	12350000, 12352600	1	4	70	0	0	茶系色ダウンコート、帽子、キャスター付き鞄
12352600	3	12350000, 12352001	0	4	70	0	0	ショルダーバッグ、ショートカット
12351800	2	12351701
12351701	2	12351800
12352302	2	12355600
12355600	2	12352302
12353301	2	12354101
12354101	2	12353301
12370401	4	12371200, 12370800, 12370600
12371200	4	12370401, 12370800, 12370600
12370800	4	12370401, 12371200, 12370600
12370600	4	12370401, 12371200, 12370800
12371600	2	12371700
12371700	2	12371600
12370901	2	12373900
12373900	2	12370901
12375701	2	12380000
12380000	2	12375701
12381600	3	12382400, 12381800	2	2	40	1	1	ネクタイ、作業着ジャンバー
12382400	3	12381600, 12381800	2	2	40	1	1	白シャツに紺色ベスト
12381800	3	12381600, 12382400	2	2	40	1	1	グレーセーター
12383202	2	no ID
no ID	2	12383202
12380100	3	12385000, 12383702	2	2	50	1	1	グレーシャツ、手にセカンドバッグ
12385000	3	12380100, 12383702	2	2	40	1	1	スーツにロングコート、両手は、ポケット、
12383702	3	12380100, 12385000	2	2	40	1	1	手提げ鞄、白シャツに黒スーツ
12384100	2	12391000
12391000	2	12384100
12381900	2	12391300
12391300	2	12381900
12390800	2	12390000
12390000	2	12390800
12390801	2	12382300
12382300	2	12390801
12390900	2	12391301
12391301	2	12390900
12393300	2	12393101
12393101	2	12393300
12394100	3	12394500, 12300502	2	3	40	0	0	ベージュ色ダウンコート、紫ピンク色マフラー、ショルダーバッグ
12394500	3	12394100, 12300502	2	3	40	0	0	ベージュ色ブーツ、茶色ダウンコート
12300502	3	12394100, 12394500	2	3	70	0	0	黒色ダウンコート、ショルダーバッグ
12403900	2	12403700
12403700	2	12403900
12391102	2	no ID
no ID	2	12391102
12410901	2	12410200
12410200	2	12410901
12421400	2	12414200
12414200	2	12421400
12421001	2	12421401
12421401	2	12421001
12421202	3	12421701, 12421600	0	2	30	1	1	白シャツに黒色セーター、
12421701	3	12421202, 12421600	0	2	60	1	1	白色スニーカー、ベスト、左手ポケット
12421600	3	12421202, 12421701	0	2	50	1	1	黒色セーターを腕まくり、ネクタイ、
12431000	3	12424900, 12430900	2	2	50	1	1	外国人、デニムにグレー色半そでポロシャツ
12424900	3	12431000, 12430900	2	2	40	1	1	外国人、黒色セーター、スキンヘッド
12430900	3	12431000, 12424900	2	2	40	1	1	外国人、デニムにグレーTシャツ
12432500	2	12433200
12433200	2	12432500
12434401	2	12431702
12431702	2	12434401
12434701	2	12432900
12432900	2	12434701
12432600	4	12433000, 12430301, 12433800
12433000	4	12432600, 12430301, 12433800
12430301	4	12432600, 12433000, 12433800
12433800	4	12432600, 12433000, 12430301
12441700	2	12441601
12441601	2	12441700
12450701	2	12450200
12450200	2	12450701
12452200	2	12454200
12454200	2	12452200
12452500	2	12453000
12453000	2	12452500
12462000	2	12462102
12462102	2	12462000
12460200	2	12460300
12460300	2	12460200
12473300	2	12473800
12473800	2	12473300
12472800	2	12472801
12472801	2	12472800
12475600	3	12401100, 12475801	2	2	40	1	1	外国人、黒色セーター、スキンヘッド	12424900と同一人物？
12401100	3	12475600, 12475801	2	2	40	1	1	外国人、デニムにグレーTシャツ	12430900と同一人物？
12475801	3	12475600, 12401100	2	2	50	1	1	外国人、デニムにグレー色半そでポロシャツ	12431000と同一人物？ 12472801pid?
12475700	4	12480601, 12480001, 12480900
12480601	4	12475700, 12480001, 12480900
12480001	4	12475700, 12480601, 12480900
12480900	4	12475700, 12480601, 12480001
12482301	2	12483200
12483200	2	12482301
12484700	2	12484400
12484400	2	12484700
12491300	3	12490300, 12484101	2	2	50	1	1	水色作業着
12490300	3	12491300, 12484101	2	2	50	1	1	黒ベスト、白スニーカー
12484101	3	12491300, 12490300	2	2	50	1	1	マスク、眼鏡
12492001	2	12491301
12491301	2	12492001
12492301	2	12492701
12492701	2	12492301
12492702	2	no ID
no ID	2	12492702
12495601	2	12494800
12494800	2	12495601
12494700	2	12501500
12501500	2	12494700
12494903	2	12500500
12500500	2	12494903
12500100	2	12500101
12500101	2	12500100
12504400	2	12485900
12485900	2	12504400
12503400	2	12502701
12502701	2	12503400
12511901	2	no ID
no ID	2	12511901
12505500	3	12510601, 12505300	2	2	40	0	1	ショートカット、黒パンツ、右手にジュース
12510601	3	12505500, 12505300	1	2	40	0	1	紫色コート、スカート、ショルダーバッグ
12505300	3	12505500, 12510601	1	2	40	1	1	紺色スーツ
12512201	2	12512200
12512001	2	12512201
12514901	2	12523300
12523300	2	12514901
12523600	2	12523900
12523900	2	12523600
12535002	4	12534600, 12535400, 12535000
12534600	4	12535002, 12535400, 12535000
12535400	4	12535002, 12534600, 12535000
12535000	4	12535002, 12534600, 12535400
12533500	2	12533600
12533600	2	12533500
no ID	2	no ID
no ID	2	no ID
12540100	2	12540000
12540000	2	12540100
12543500	2	12541300
12541300	2	12543500
12543201	2	12545300
12545300	2	12543201
12543700	2	12544700
12544700	2	12543700
12550501	3	12550500, 12544900	2	2	50	1	1	黒パンツ、作業着ジャンバー、腕組み、眼鏡、
12550500	3	12550501, 12544900	2	2	30	1	1	上下水色作業
12544900	3	12550501, 12550500	2	2	40	1	1	白シャツ、黒パンツ
12551001	2	12551900
12551900	2	12551001
12554200	2	12554500
12554500	2	12554200
12554900	2	12554700
12554700	2	12554900
12560902	2	12554300
12554300	2	12560902
12541300	2	12555300
12555300	2	12541300
12571500	2	12570900
12570900	2	12571500
12570502	2	12564701
12564701	2	12570502
12570904	2	12570902
12570902	2	12570904
12572800	2	12573001
12573001	2	12572800
12581400	2	12582202
12582202	2	12581400
12582401	3	12582400, 12582201	2	2	40	1	1	上下白色作業着、左手に上着、
12582400	3	12582401, 12582201	2	2	50	1	1	ベージュ色ジャンバー、黒色パンツ、ショルダーバッグ
12582201	3	12582401, 12582400	2	2	50	0	1	薄ピンク色コート、黒鞄
12582500	2	12582800
12582800	2	12582500
12585900	2	12590200
12590200	2	12585900
12591100	2	12590600
12590600	2	12591100
14593800	2	14592400
14592400	2	14593800
15005700	2	15005600
15005600	2	15005700
15013200	3	15015201, 15020700	2	3	20	1	0	紺色コート、デニム、ショルダーバッグ
15015201	3	15013200, 15020700	2	3	20	0	0	黒パンツ、眼鏡、
15020700	3	15013200, 15015201	2	3	50	0	0	お団子ヘア、黒ブーツ、
15014600	2	15014500
15014500	2	15014600
15015701	2	15020100
15020100	2	15015701
15025400	2	15030200
15030200	2	15025400
15031900	2	15032100
15032100	2	15031900
15031901	2	15031902
15031902	2	15031901
15055100	2	15055200
15055200	2	15055100
15063500	3	15063603, 15063600	2	4	40	0	0	茶色ブーツ、紫色スカーフ
15063603	3	15063500, 15063600	2	4	30	0	0	紫色の肩掛け鞄
15063600	3	15063500, 15063603	2	4	30	0	0	黒色コート、ベージュ系手提げ鞄
15083100	2	15075900
15075900	2	15083100
15081001	2	15075800
15075800	2	15081001
15075900	3	15084500, 15084400	0	2	50	1	1	スーツ、左手ポケット
15084500	3	15075900, 15084400	0	2	50	1	1	白髪混じり、眼鏡、左手ポケット
15084400	3	15075900, 15084500	0	2	40	1	1	黒色スーツ
15080700	2	15090200
15090200	2	15080700
15100300	2	15095101
15095101	2	15100300
15141500	2	15141200
15141200	2	15141500
15102200	2	15155500
15155500	2	15102200
15173300	2	15173400
15173400	2	15173300
15184400	2	15190100
15190100	2	15184400
15191702	2	15191701
15191701	2	15191702
15194900	2	15195001
15195001	2	15194900
15195400	3	15200700, 15195200	1	2	50	1	1	ベージュ色ロングコート、鞄
15200700	3	15195400, 15195200	2	2	50	0	1	黒色コート、グレー色パンツ、スカーフ
15195200	3	15195400, 15200700	1	2	50	1	1	黒色ロングコート、眼鏡、鞄
15212400	2	15212500
15212500	2	15212400
15215100	2	15215300
15215300	2	15215100
15211700	3	15211600, 15212000	2	2	40	1	1	黒色コート、肩の位置で鞄持つ
15211600	3	15211700, 15212000	2	2	40	1	1	3人組の真ん中、黒色コートコート
15212000	3	15211700, 15211600	2	2	40	1	1	ショルダーバッグ
15221400	2	15222001
15222001	2	15221400
15232600	2	15232500
15232500	2	15232600
15245100	2	no ID
no ID	2	15245100
15264900	3	15264901, 15264801	0	2	20	1	1	赤茶色コート,黒リュック
15264901	3	15264900, 15264801	0	2	20	0	1	薄ピンク色ジャンバー、スカート
15264801	3	15264900, 15264901	0	2	30	0	1	黄色鞄
15264000	2	15271700
15271700	2	15264000
15262900	2	15272701
15272701	2	15262900
15282500	3	15282501, 15282600	0	2	30	0	1	カーキ色フード有コート、
15282501	3	15282500, 15282600	0	2	30	1	1	ベージュ色ジャケット、電話中
15282600	3	15282500, 15282501	0	2	30	1	1	茶系パンツ、黒ジャケット、手提げ鞄
15290200	2	15290600
15290600	2	15290200
15303200	2	15302900
15302900	2	15303200
15311300	2	15311500
15311500	2	15311300
15312501	2	15312000
15312000	2	15312501
15313500	4	15302601, 15303300, 15302000
15302601	4	15313500, 15303300, 15302000
15303300	4	15313500, 15302601, 15302000
15302000	4	15313500, 15302601, 15303300
15331800	2	15334600
15334600	2	15331800
15331100	2	15332101
15332101	2	15331100
15333300	2	15334300
15334300	2	15333300
15355900	2	15350500
15350500	2	15355900
15362800	2	no ID
no ID	2	15362800
15360000	4	15341801, 15361500, 15363200
15341801	4	15360000, 15361500, 15363200
15361500	4	15360000, 15341801, 15363200
15363200	4	15360000, 15341801, 15361500
15343700	2	15355501
15355501	2	15343700
15364900	2	15360200
15360200	2	15364900
15365601	2	15364200
15364200	2	15365601
15370500	2	15370501
15370501	2	15370500
15365001	2	15370500
15370500	2	15365001
15390800	2	15390500
15390500	2	15390800
15393200	3	15393400, 15393100	1	2	40	1	1	濃ベージュ色パンツ、スニーカー
15393400	3	15393200, 15393100	0	2	40	1	1	薄ベージュ系パンツ、
15393100	3	15393200, 15393400	1	2	40	1	1	黒リュックサックと黒ショルダーバッグ
15392700	2	15392501
15392501	2	15392700
15394300	2	15394400
15394400	2	15394300
15401000	3	15400900, 15401300	2	2	50	1	1	青色ネクタイ、紺色コート
15400900	3	15401000, 15401300	2	2	50	1	1	眼鏡、スーツ、茶色革靴
15401300	3	15401000, 15400900	2	2	50	1	1	紺色コートの裏地がベージュ色
15403801	2	15403300
15403300	2	15403801
15403100	2	15155501
15155501	2	15403100
15413300	2	no ID
no ID	2	15413300
15413801	2	15413901
15413901	2	15413801
15410501	2	15412800
15412800	2	15410501
15415100	4	15415200, 15415000, 15415201
15415200	4	15415100, 15415000, 15415201
15415000	4	15415100, 15415200, 15415201
15415201	4	15415100, 15415200, 15415000
15415800	2	15415500
15415500	2	15415800
15424300	2	15421400
15421400	2	15424300
15425800	2	15425701
15425701	2	15425800
15424300	2	15431000
15431000	2	15424300
15435600	3	15435500, 15435601	1	2	40	1	1	スーツ、右手に青色ファイル
15435500	3	15435600, 15435601	1	2	50	1	1	スーツ、
15435601	3	15435600, 15435500	0	2	60	1	1	白髪
15444002	3	15441901, 15444500	0	4	16	1	0	高校制服、左肩鞄、スマホ中
15441901	3	15444002, 15444500	1	4	16	1	0	高校制服、右肩鞄、茶色系靴
15444500	3	15444002, 15441901	1	4	16	1	0	高校制服、右肩鞄、白色系靴
15443601	2	15452400
15452400	2	15443601
15463800	2	15463600
15463600	2	15463800
15470100	3	15470000, 15470500	2	2	50	1	1	ベージュ色ダスターコート、
15470000	3	15470100, 15470500	2	2	40	1	1	黒コート、黒鞄、白ビニールショッピングバッグ
15470500	3	15470100, 15470000	2	2	50	0	1	グレー色パンツ、薄紫色スカーフ
15481800	2	15481300
15481300	2	15481800
15480900	2	15480500
15480500	2	15480900
15483400	2	15483301
15483301	2	15483400
15485600	2	15490000
15490000	2	15485600
15485300	2	15485400
15485400	2	15485300
15481800	2	15490100
15490100	2	15481800
15495600	2	15495900
15495900	2	15495600
15500400	2	15440201
15440201	2	15500400
15524200	2	15524100
15524100	2	15524200
15540000	2	15535200
15535200	2	15540000
15542100	2	15534500
15534500	2	15542100
15540201	2	15541101
15541101	2	15540201
15542600	2	15542500
15542500	2	15542600
15545200	2	15545900
15545900	2	15545200
15540100	2	15552400
15552400	2	15540100
15563100	2	no ID
no ID	2	15563100
15573201	2	15573200
15573200	2	15573201
15573901	2	15573900
15573900	2	15573901
15574301	3	15574400, 15574300	2	4	60	0	0	薄ピンク色ダウンコート
15574400	3	15574301, 15574300	2	4	60	0	0	薄グレー色ダウンコート
15574300	3	15574301, 15574400	2	4	60	0	0	ベージュ色ダウンコート
15485401	2	15584700
15584700	2	15485401
18592300	3	18592600, no ID	2	3	30	0	0	母、薄グレーダウンコート、ベージュ色パンツ
18592600	3	18592300, no ID	2	3	12	0	0	姉、ピンク色ハイソックス、鞄
no ID	3	18592300, 18592600	2	3	6	0	0	妹、ピンク色ダウンコート、白スカート
19003200	2	19003300
19003300	2	19003200
19013600	2	18573400
18573400	2	19013600
19014600	2	no ID
no ID	2	19014600
19032900	4	19031301, 19032600, 19040700
19031301	4	19032900, 19032600, 19040700
19032600	4	19032900, 19031301, 19040700
19040700	4	19032900, 19031301, 19032600
19031300	2	19031400
19031400	2	19031300
19040700	2	no ID
no ID	2	19040700
19073100	2	19073101
19073101	2	19073100
19091100	2	19090901
19090901	2	19091100
19091000	2	19090902
19090902	2	19091000
19101001	4	19100701, 19101900, 19101000
19100701	4	19101001, 19101900, 19101000
19101900	4	19101001, 19100701,19101000
19101000	4	19101001, 19100701, 19101900
19103900	2	19104900
19104900	2	19103900
19110801	2	19110900
19110900	2	19110801
19114500	2	19114700
19114700	2	19114500
19113300	2	19115400
19115400	2	19113300
19140900	2	19140901
19140901	2	19140900
19152400	2	19152401
19152401	2	19152400
19172900	2	19172801
19172801	2	19172900
19210800	2	19211200
19211200	2	19210800
19220300	2	19215500
19215500	2	19220300
19222600	2	19222801
19222801	2	19222600
19223800	2	19223800
19224000	2	19224000
19233500	2	19233300
19233300	2	19233500
19253402	2	19253400
19253400	2	19253402
19261300	2	19261300
19261200	2	19261200
19261800	2	19261900
19261900	2	19261800
19265200	2	19265300
19265300	2	19265200
19274501	2	19274500
19274500	2	19274501
19311900	2	19311800
19311800	2	19311900
19314800	2	19314601
19314601	2	19314800
19323501	2	19323502
19323502	2	19323501
19344100	2	19340001
19340001	2	19344100
19383800	3	19384200, 19383700	2	2	40	1	1	グレー色ダウンコート
19384200	3	19383800, 19383700	2	2	40	1	1	白色ダウンコート、斜め掛けかばん
19383700	3	19383800, 19384200	2	2	40	1	1	オレンジ色スーツケース
19394900	3	19402501, 19394801	2	3	10	0	0	娘、白のニット帽、スカート
19402501	3	19394900, 19394801	2	3	40	1	0	父、黒ダウンコート、
19394801	3	19394900, 19402501	2	3	40	0	0	母、黒ダウンコート、白鞄
19404600	2	19404400
19404400	2	19404600
19405501	2	19404900
19404900	2	19405501
19412500	2	19411800
19411800	2	19412500
19433200	2	19433400
19433400	2	19433200
19435600	2	19435400
19435400	2	19435600
19435200	4	19435101, no ID, 19440000
19435101	4	19435200, no ID, 19440000
no ID	4	19435200, 19435101, 19440000
19440000	4	19435200, 19435101, no ID
19432601	7	19431100, 19432800, 19441101, 19431501, 19431900, 19431301
19431100	7	19432601, 19432800, 19441101, 19431501, 19431900, 19431301
19432800	7	19432601, 19431100, 19441101, 19431501, 19431900, 19431301
19441101	7	19432601, 19431100, 19432800, 19431501, 19431900, 19431301
19431501	7	19432601, 19431100, 19432800, 19441101, 19431900, 19431301
19431900	7	19432601, 19431100, 19432800, 19441101, 19431501, 19431301
19431301	7	19432601, 19431100, 19432800, 19441101, 19431501, 19431900
19443300	2	19443000
19443000	2	19443300
19445400	3	19445200, 19445100	2	2	40	1	1	ベージュ色コート、黒鞄
19445200	3	19445400, 19445100	2	2	30	0	1	ベージュ色ジャケット、黒パンツ、ショートカット
19445100	3	19445400, 19445200	2	2	40	1	1	黒ジャケット、ベージュ色かばん
19455100	4	19454300, 19460601, 19460602
19454300	4	19455100, 19460601, 19460602
19460601	4	19455100, 19454300, 19460602
19460602	4	19455100, 19454300, 19460601
19471400	3	19471500, 19471200	1	2	40	1	1	紺色ロングコート、紫色紙袋、グレー色パンツ
19471500	3	19471400, 19471200	0	2	40	1	1	黒ショルダーと黒手提げ鞄、白紙袋
19471200	3	19471400, 19471500	1	2	40	1	1	黒色上下、黒ショルダーバッグ、黒肩掛け鞄
19472600	2	19472400
19472400	2	19472600
19492300	2	19492800
19492800	2	19492300
19501200	2	19501000
19501000	2	19501200
19510800	2	no ID
no ID	2	19510800
19512800	3	19515600, 19512701	2	3	30	0	0	姉 ID18592600と同一人物ピンク色ハイソックス、鞄
19515600	3	19512800, 19512701	2	3	12	0	0	妹 no IDと同一人物ピンク色ダウンコート、白スカート
19512701	3	19512800, 19515600	2	3	6	0	0	母 ID18592300と同一人物薄グレーダウンコート、ベージュ色パンツ
19520700	3	19520800, 19522100	2	3	20	0	0	娘、ベージュ系ショートブーツ、黒ショルダーバッグ
19520800	3	19520700, 19522100	2	3	40	0	0	母、ピンク色小さめ買い物袋、黒パンツ
19522100	3	19520700, 19520800	2	3	50	1	0	父グレー色コート
19524601	2	19524700
19524700	2	19524601
19531501	2	19530500
19530500	2	19531501
19525001	2	19524500
19524500	2	19525001
19520400	3	19560500, 19555800	2	3	40	0	0	母、ID19520800と同一人物ピンク色小さめ買い物袋、黒パンツ
19560500	3	19520400, 19555800	2	3	20	0	0	娘、ID19520700と同一人物ベージュ系ショートブーツ、黒ショルダーバッグ
19555800	3	19520400, 19560500	2	3	50	1	0	父、ID19522100と同一人物グレー色コート
19563100	2	19563000
19563000	2	19563100
19565700	2	19570900
19570900	2	19565700
19590000	2	19585901
19585901	2	19590000
19583100	2	19582700
19582700	2	19583100
19592800	2	19593700
19593700	2	19592800
