# Supplementary material for: Intrinsic group behaviour II: On the dependence of triad spatial dynamics on social and personal features; and on the effect of social interaction on small group dynamics
Source: PLoS One. 2019 Dec 3;14(12):e0225704. doi: 10.1371/journal.pone.0225704 (PMC6890182; doi:10.1371/journal.pone.0225704)
Supplement: S1 Annex — (ZIP) [file pone.0225704.s005.zip › annex_1/interaction_coding.xlsx]

## Sheet: 20130424
歩行者ID (pedestrian ID)	Gサイズ (group size)	同行ID (partner ID)	相手サイズ (number of interaction partners)	相手ID (interaction partner ID)	備考 (remarks)	視線： 相手を見た (gaze: watched the partner)	会話中にしか出ないような身振り、口の動きがあった (behaviours seen only during conversation, such as moving the mouth)	視線： 同じ方向を見た (gaze: watched in the same direction)	フィジカル コンタクト (physical contact)	その他 (other)	判断つかず （根拠はないけど会話しているように見える） (not used: looks like they are having a conversation but it is impossible to judge)	メモ (notes)
10050100	2	10045500	1	10045500		○	○
10045500	2	10050100	1	10050100		○
10061100	2	10063001	1	10063001		○
10063001	2	10061100	1	10061100
10093200	2	10100800	1	10100800		○
10100800	2	10093200	1	10093200
10140500	2	10140400	1	10140400		○				○
10140400	2	10140500	1	10140500		○				○
10191700	2	10191501	1	10191501		○
10191501	2	10191700	1	10191700		○
10182000	2	no ID	1	no ID		○				○
no ID	2	10182000	1	10182000		○				○
10202000	2	10202100	1	10202100			○
10202100	2	10202000	1	10202000		○
10211200	2	10211600	0	0
10211600	2	10211200	0	0
10221800	3	10204500, 10222000	2	10204500, 10222000		○	○
10204500	3	10221800, 10222000	2	10221800, 10222000		○	○
10222000	3	10221800, 10204500	2	10221800, 10204500		○	○
10244900	2	10245101	0	0
10245101	2	10244900	0	0
10251900	3	10251700, 10251902	0	0
10251700	3	10251900, 10251902	0	0
10251902	3	10251900, 10251700	0	0
10251400	2	10252800	1	10252800		○	○			○
10252800	2	10251400	1	10251400		○				○
10214900	2	10233500	1	10233500		○	○
10233500	2	10214900	1	10214900
10280001	2	10275200	0	0
10275200	2	10280001	0	0
10294900	2	10294700	1	10294700		○
10294700	2	10294900	1	10294900
10322100	2	10322701	0	0
10322701	2	10322100	0	0
10341600	2	10341700	1	10341700		○
10341700	2	10341600	1	10341600		○
10363000	2	10362900	1	10362900				○
10362900	2	10363000	1	10363000			○	○
10382601	2	10383800	1	10383800			○	○
10383800	2	10382601	1	10382601				○
10403500	2	10403800	1	10403800					○
10403800	2	10403500	1	10403500
10403100	2	10405300	0	0
10405300	2	10403100	0	0
10414300	2	10414000	1	10414000					○
10414000	2	10414300	1	10414300					○
10420101	4	10420103, 10420300, 10420400	0	0
10420103	4	10420101, 10420300, 10420400	0	0
10420300	4	10420101, 10420103, 10420400	1	10420400		○
10420400	4	10420101, 10420103, 10420300	1	10420300
10445801	3	10442300, 10442800	2	10442300, 10442800		○
10442300	3	10445801, 10442800	2	10445801, 10442800		○			○
10442800	3	10445801, 10442300	2	10445801, 10442300		○
10444900	2	10444800	0	0
10444800	2	10444900	0	0
10465201	2	10465103	1	10465103		○
10465103	2	10465201	1	10465201
10465102	2	10465200	1	10465200		○
10465200	2	10465102	1	10465102		○
10473400	3	10473300, 10464900	1	10473300		○		○		○
10473300	3	10473400, 10464900	2	10473400, 10464900		○		○		○
10464900	3	10473400, 10473300	1	10473300				○
10464901	3	10471400, 10464400	2	10471400, 10464400			○	○
10471400	3	10464901, 10464400	2	10464901, 10464400				○
10464400	3	10464901, 10471400	2	10464901, 10471400				○
10472100	2	10472200	0	0
10472200	2	10472100	0	0
10481201	2	10481600	1	10481600		○
10481600	2	10481201	1	10481201
10491400	2	10491500	1	10491500		○	○
10491500	2	10491400	1	10491400
10534301	5	10534300, 10534500, 10534401, 10534400	1	10534300		○	○
10534300	5	10534301, 10534500, 10534401, 10534400	1	10534301
10534500	5	10534301, 10534300, 10534401, 10534400	0	0
10534401	5	10534301, 10534300, 10534500, 10534400	0	0
10534400	5	10534301, 10534300, 10534500, 10534401	0	0
10552100	2	10552600	1	10552600		○
10552600	2	10552100	1	10552100		○
10553100	2	10552900	1	10552900		○
10552900	2	10553100	1	10553100
10560202	2	10560400	1	10560400
10560400	2	10560202	1	10560202		○	○
10564000	2	10563700	0	0
10563700	2	10564000	0	0
10551100	2	10560201	1	10560201		○	○
10560201	2	10551100	1	10551100		○
10570702	2	10570701	1	10570701					○
10570701	2	10570702	1	10570702					○
10575500	2	10572500	1	10572500		○			○	○
10572500	2	10575500	1	10575500		○			○	○
10580300	2	10575400	1	10575400						○
10575400	2	10580300	1	10580300						○		先に店に入った相手を追って、店に入っていった。
12005700	2	12005600	1	12005600		○
12005600	2	12005700	1	12005700		○
12015500	2	12015300	1	12015300
12015300	2	12015500	1	12015500			○
12024200	2	12023800	1	12023800		○
12023800	2	12024200	1	12024200		○
11583000	2	12024900	1	12024900		○
12024900	2	11583000	1	11583000		○
12025200	2	12025100	1	12025100		○	○
12025100	2	12025200	1	12025200		○
12040200	2	12040500	1	12040500			○
12040500	2	12040200	1	12040200			○	○
12041400	2	12041200	1	12041200		○
12041200	2	12041400	1	12041400		○
12042500	2	12042200	1	12042200
12042200	2	12042500	1	12042500		○	○
12024600	2	11583200	1	11583200		○	○
11583200	2	12024600	1	12024600		○
12050000	2	12045500	1	12045500		○	○
12045500	2	12050000	1	12050000
12064800	3	12064400, 12060500	2	12064400, 12060500		○
12064400	3	12064800, 12060500	2	12064800, 12060500		○
12060500	3	12064800, 12064400	2	12064800, 12064400		○
12065700	4	12065200, 12065300, 12065800	1	12065200		○
12065200	4	12065700, 12065300, 12065800	1	12065700		○	○
12065300	4	12065700, 12065200, 12065800	1	12065800		○
12065800	4	12065700, 12065200, 12065300	1	12065300		○	○
12070800	2	12070600	1	12070600		○	○
12070600	2	12070800	1	12070800		○
12071100	2	12071000	1	12071000		○	○
12071000	2	12071100	1	12071100		○
12074800	2	12074701	1	12074701
12074701	2	12074800	1	12074800		○
12074400	3	12075701, 12074500	2	12075701, 12074500		○	○
12075701	3	12074400, 12074500	2	12074400, 12074500		○	○
12074500	3	12074400, 12075701	2	12074400, 12075701		○
12081400	2	12081300	1	12081300		○
12081300	2	12081400	1	12081400
12083901	2	12084100	1	12084100		○
12084100	2	12083901	1	12083901		○
12085600	3	12085200, 12082200	2	12085200, 12082200		○
12085200	3	12085600, 12082200	2	12085600, 12082200		○			○
12082200	3	12085600, 12085200	2	12085600, 12085200		○
12090101	2	12090000	1	12090000		○
12090000	2	12090101	1	12090101		○	○
12083800	2	12083903	0	0
12083903	2	12083800	0	0
12092000	2	12094200	1	12094200
12094200	2	12092000	1	12092000		○
12103400	2	12103500	1	12103500			○	○
12103500	2	12103400	1	12103400				○
12112801	2	12110700	1	12110700			○
12110700	2	12112801	1	12112801
12121400	3	12114200, 12114201	2	12114200, 12114201		○
12114200	3	12121400, 12114201	2	12121400, 12114201			○
12114201	3	12121400, 12114200	2	12121400, 12114200
12122400	2	12122300	1	12122300		○
12122300	2	12122400	1	12122400		○	○
12125901	2	12125001	1	12125001		○
12125001	2	12125901	1	12125901		○
12133202	3	12133001, 12133000	2	12133001, 12133000		○
12133001	3	12133202, 12133000	2	12133202, 12133000
12133000	3	12133202, 12133001	2	12133202, 12133001		○
12135000	2	12133500	1	12133500				○
12133500	2	12135000	1	12135000			○	○
12145900	2	12145600	1	12145600		○
12145600	2	12145900	1	12145900		○
12150800	2	12151100	0	0
12151100	2	12150800	0	0
12155100	3	12155700, 12160100	2	12155700, 12160100		○			○	○
12155700	3	12155100, 12160100	2	12155100, 12160100		○			○	○
12160100	3	12155100, 12155700	2	12155100, 12155700		○				○
12155600	2	12160001	1	12160001		○
12160001	2	12155600	1	12155600		○
12164900	2	12164500	0	0
12164500	2	12164900	0	0
12165401	2	12165400	1	12165400		○	○
12165400	2	12165401	1	12165401			○
12174000	2	12173700	0	0
12173700	2	12174000	0	0
12175100	2	12174500	1	12174500		○
12174500	2	12175100	1	12175100		○
12175803	3	12174601, 12174801	2	12174601, 12174801		○
12174601	3	12175803, 12174801	2	12175803, 12174801			○
12174801	3	12175803, 12174601	2	12175803, 12174601		○
12175904	2	12175900	1	12175900
12175900	2	12175904	1	12175904		○
12180103	2	12180102	0	0
12180102	2	12180103	0	0
12180400	3	12180000, 12175802	0	0
12180000	3	12180400, 12175802	0	0
12175802	3	12180400, 12180000	0	0
12180300	2	no ID	0	0
no ID	2	12180300	0	0
12180701	2	12180502	0	0
12180502	2	12180701	0	0
12180600	2	no ID	1	no ID		○
no ID	2	12180600	1	12180600		○
12182000	2	12181600	1	12181600		○	○
12181600	2	12182000	1	12182000		○
12183101	3	no ID, 12183301	2	no ID, 12183301		○
no ID	3	12183101, 12183301	2	12183101, 12183301
12183301	3	12183101, no ID	2	12183101, no ID		○
12184500	2	12184600	0	0
12184600	2	12184500	0	0
12184200	3	12184900, 12185300	2	12184900, 12185300		○
12184900	3	12184200, 12185300	2	12184200, 12185300		○
12185300	3	12184200, 12184900	2	12184200, 12184900
12185500	4	12185600, 12185701, 12185601	0	0
12185600	4	12185500, 12185701, 12185601	2	12185701, 12185601		○	○
12185701	4	12185500, 12185600, 12185601	2	12185600, 12185601		○	○
12185601	4	12185500, 12185600, 12185701	2	12185600, 12185701
12190801	2	12190901	1	12190901		○
12190901	2	12190801	1	12190801		○	○
12181500	2	12140000	1	12140000		○
12140000	2	12181500	1	12181500		○
12192600	2	12192301	1	12192301		○
12192301	2	12192600	1	12192600
12194900	2	12195001	1	12195001			○
12195001	2	12194900	1	12194900		○
12202200	3	12202101, 12202000	0	0
12202101	3	12202200, 12202000	0	0
12202000	3	12202200, 12202101	0	0
12204101	2	12204200	1	12204200		○
12204200	2	12204101	1	12204101		○
12201400	2	12205401	1	12205401
12205401	2	12201400	1	12201400		○	○
12211401	2	12211001	0	0
12211001	2	12211401	0	0
12210102	3	12210400, 12210001	2	12210400, 12210001		○
12210400	3	12210102, 12210001	2	12210102, 12210001		○
12210001	3	12210102, 12210400	2	12210102, 12210400
12221200	2	12220901	1	12220901		○
12220901	2	12221200	1	12221200		○
12220701	2	12220902	1	12220902		○
12220902	2	12220701	1	12220701		○
12222400	2	12222203	0	0
12222203	2	12222400	0	0
12223905	2	12220700	1	12220700		○
12220700	2	12223905	1	12223905		○
12223700	2	12221501	0	0
12221501	2	12223700	0	0
12224200	2	12215600	1	12215600		○
12215600	2	12224200	1	12224200		○	○
12233700	3	12233000, 12232901	1	12233000		○
12233000	3	12233700, 12232901	1	12233700		○
12232901	3	12233700, 12233000	0	0
12235802	3	12235600, 12234900	2	12235600, 12234900		○		○
12235600	3	12235802, 12234900	2	12235802, 12234900		○	○	○
12234900	3	12235802, 12235600	2	12235802, 12235600		○		○
12240801	4	12240800, 12235501, 12241301	1	12240800
12240800	4	12240801, 12235501, 12241301	1	12240801		○
12235501	4	12240801, 12240800, 12241301	0	0
12241301	4	12240801, 12240800, 12235501	0	0
12244002	2	12243501	1	12243501		○	○
12243501	2	12244002	1	12244002		○	○
12225800	2	12241500	1	12241500					○
12241500	2	12225800	1	12225800					○
12250600	2	12250401	1	12250401		○
12250401	2	12250600	1	12250600		○
12254800	2	12255900	1	12255900				○
12255900	2	12254800	1	12254800			○	○
12250401	2	12250600	0	0
12250600	2	12250401	0	0
12271200	3	12271400, 12271401	2	12271400, 12271401		○
12271400	3	12271200, 12271401	2	12271200, 12271401		○
12271401	3	12271200, 12271400	2	12271200, 12271400		○
12275500	2	12275802	1	12275802		○
12275802	2	12275500	1	12275500		○
12275700	2	no ID	1	no ID		○
no ID	2	12275700	1	12275700
12285800	2	12285900	0	0
12285900	2	12285800	0	0
12290900	2	12294901	1	12294901		○	○
12294901	2	12290900	1	12290900
12293900	2	12285900	1	12285900		○
12285900	2	12293900	1	12293900		○
12294700	6	12295900, 12281900, no ID, 12295301, 12292400	2	12295900, 12281900					○
12295900	6	12294700, 12281900, no ID, 12295301, 12292400	2	12294700, 12281900		○
12281900	6	12294700, 12295900, no ID, 12295301, 12292400	2	12294700, 12295900					○
no ID	6	12294700, 12295900, 12281900, 12295301, 12292400	0	0
12295301	6	12294700, 12295900, 12281900, no ID, 12292400	0	0
12292400	6	12294700, 12295900, 12281900, no ID, 12295301	0	0
12295500	2	12304700	1	12304700					○
12304700	2	12295500	1	12295500					○
12303800	3	12305100, 12310700	2	12305100, 12310700		○
12305100	3	12303800, 12310700	2	12303800, 12310700		○
12310700	3	12303800, 12305100	2	12303800, 12305100		○
12313800	3	12315700, 12304900	2	12315700, 12304900		○			○
12315700	3	12313800, 12304900	2	12313800, 12304900		○			○
12304900	3	12313800, 12315700	2	12313800, 12315700					○
12315800	6	12320101, 12315702, 12320100, 12320300, 12320000	2	12320101, 12315702		○
12320101	6	12315800, 12315702, 12320100, 12320300, 12320000	2	12315800, 12315702		○
12315702	6	12315800, 12320101, 12320100, 12320300, 12320000	2	12315800, 12320101		○
12320100	6	12315800, 12320101, 12315702, 12320300, 12320000	0	0
12320300	6	12315800, 12320101, 12315702, 12320100, 12320000	1	12320000		○
12320000	6	12315800, 12320101, 12315702, 12320100, 12320300	1	12320300		○
12322500	2	12322401	1	12322401			○
12322401	2	12322500	1	12322500
12333601	2	12340601	1	12340601				○	○
12340601	2	12333601	1	12333601			○	○	○
12340500	4	12344101, 12340602, 12341000	1	12344101		○
12344101	4	12340500, 12340602, 12341000	1	12340500		○	○
12340602	4	12340500, 12344101, 12341000	0	0
12341000	4	12340500, 12344101, 12340602	0	0
12333701	3	12333900, 12334700	2	12333900, 12334700		○
12333900	3	12333701, 12334700	2	12333701, 12334700
12334700	3	12333701, 12333900	2	12333701, 12333900		○
12343001	2	12343002	1	12343002		○	○
12343002	2	12343001	1	12343001		○	○
12350800	2	12350101	1	12350101
12350101	2	12350800	1	12350800		○
12352400	2	12353000	1	12353000		○	○
12353000	2	12352400	1	12352400			○
12363300	2	12363701	1	12363701
12363701	2	12363300	1	12363300		○
12362902	2	12362801	1	12362801		○
12362801	2	12362902	1	12362902		○
12370500	2	12370001	1	12370001		○	○
12370001	2	12370500	1	12370500		○	○
12371701	2	no ID	1	no ID		○				○
no ID	2	12371701	1	12371701		○
12373600	2	12375202	1	12375202		○	○
12375202	2	12373600	1	12373600			○
12374302	2	12374600	0	0
12374600	2	12374302	0	0
12381900	2	12382001	1	12382001		○				○
12382001	2	12381900	1	12381900						○
12383001	2	12383000	1	12383000		○
12383000	2	12383001	1	12383001		○
12401400	2	12400800	1	12400800		○
12400800	2	12401400	1	12401400		○
12411900	2	12410600	1	12410600				○
12410600	2	12411900	1	12411900			○	○
12415502	2	12415001	1	12415001			○
12415001	2	12415502	1	12415502			○
12420200	2	12415800	1	12415800		○
12415800	2	12420200	1	12420200		○
12421000	4	12421800, 12421401, 12415400	2	12421800, 12415400		○	○
12421800	4	12421000, 12421401, 12415400	2	12421000, 12415400		○	○
12421401	4	12421000, 12421800, 12415400	1	12415400		○
12415400	4	12421000, 12421800, 12421401	3	12421000, 12421800, 12421401		○	○					反対側から来て、すれ違う時に挨拶した
12415700	2	12414102	1	12414102		○
12414102	2	12415700	1	12415700		○
12415300	2	12415401	0	0
12415401	2	12415300	0	0
12415600	2	12415500	1	12415500		○	○
12415500	2	12415600	1	12415600		○
12420500	2	12414000	1	12414000
12414000	2	12420500	1	12420500			○
12421201	3	12421300, 12421402	1	12421300		○
12421300	3	12421201, 12421402	1	12421201
12421402	3	12421201, 12421300	0	0
12430001	2	12425700	1	12425700		○
12425700	2	12430001	1	12430001		○
12424001	2	12424000	1	12424000		○				○
12424000	2	12424001	1	12424001						○
12432201	2	12432203	1	12432203		○	○
12432203	2	12432201	1	12432201		○
12440200	2	12440600	1	12440600		○
12440600	2	12440200	1	12440200			○
12444500	2	12445000	0	0
12445000	2	12444500	0	0
12452900	2	12452500	1	12452500
12452500	2	12452900	1	12452900			○
12463700	2	12463600	1	12463600		○		○
12463600	2	12463700	1	12463700				○
12462901	2	12463701	1	12463701		○
12463701	2	12462901	1	12462901		○	○
12463500	3	12464600, 12464602	2	12464600, 12464602		○	○
12464600	3	12463500, 12464602	2	12463500, 12464602
12464602	3	12463500, 12464600	2	12463500, 12464600		○	○
12463600	3	12463800, 12465500	2	12463800, 12465500		○
12463800	3	12463600, 12465500	2	12463600, 12465500
12465500	3	12463600, 12463800	2	12463600, 12463800		○
12461502	2	no ID	1	no ID			○	○
no ID	2	12461502	1	12461502				○
12465800	2	12465700	1	12465700		○	○
12465700	2	12465800	1	12465800
12473201	2	12473100	1	12473100		○
12473100	2	12473201	1	12473201
12483600	2	12475901	1	12475901						○
12475901	2	12483600	1	12483600		○				○
12474101	2	12480701	1	12480701
12480701	2	12474101	1	12474101		○	○
12484501	4	12481700, 12480600, 12473001	0	0
12481700	4	12484501, 12480600, 12473001	0	0
12480600	4	12484501, 12481700, 12473001	0	0
12473001	4	12484501, 12481700, 12480600	0	0
12490500	2	12484400	1	12484400		○
12484400	2	12490500	1	12490500		○
12493000	2	12495401	1	12495401		○
12495401	2	12493000	1	12493000		○
12494901	2	12494300	1	12494300		○
12494300	2	12494901	1	12494901
12484501	2	12473001	1	12473001		○	○
12473001	2	12484501	1	12484501
12495001	3	12495300, 12495400	2	12495300, 12495400			○
12495300	3	12495001, 12495400	2	12495001, 12495400		○			○
12495400	3	12495001, 12495300	2	12495001, 12495300					○
12521700	2	12520801	1	12520801		○
12520801	2	12521700	1	12521700		○
12522900	2	12523700	0	0
12523700	2	12522900	0	0
12522700	2	12523400	1	12523400		○	○	○
12523400	2	12522700	1	12522700				○
12524801	2	12524901	1	12524901		○			○
12524901	2	12524801	1	12524801		○			○
12523900	2	12524400	0	0
12524400	2	12523900	0	0
12525200	2	12525600	1	12525600
12525600	2	12525200	1	12525200		○
12523702	2	12524600	1	12524600
12524600	2	12523702	1	12523702		○
12525401	2	no ID	1	no ID		○
no ID	2	12525401	1	12525401
12530600	2	12534600	1	12534600		○
12534600	2	12530600	1	12530600
12531900	2	12534203	1	12534203				○
12534203	2	12531900	1	12531900			○	○
12533001	2	12433201	1	12433201		○	○
12433201	2	12533001	1	12533001		○
12535300	2	12535800	0	0
12535800	2	12535300	0	0
12545300	2	12542501	1	12542501
12542501	2	12545300	1	12545300		○
12550401	2	12550200	0	0
12550200	2	12550401	0	0
12555601	2	12555500	1	12555500			○
12555500	2	12555601	1	12555601
12554500	2	12542700	1	12542700		○	○
12542700	2	12554500	1	12554500		○
12555200	2	12555300	1	12555300					○
12555300	2	12555200	1	12555200					○
12564900	3	12562800, 12562000	2	12562800, 12562000		○	○			○
12562800	3	12564900, 12562000	2	12564900, 12562000						○
12562000	3	12564900, 12562800	2	12564900, 12562800			○			○
12563901	3	12563902, 12563900	1	12563902		○
12563902	3	12563901, 12563900	1	12563901		○
12563900	3	12563901, 12563902	0	0
12561000	2	12564000	1	12564000		○
12564000	2	12561000	1	12561000		○
12573700	2	12573200	0	0
12573200	2	12573700	0	0
12572900	2	12574300	0	0
12574300	2	12572900	0	0
12571901	2	12572400	1	12572400		○	○	○
12572400	2	12571901	1	12571901				○
12555300	2	12572600	1	12572600		○
12572600	2	12555300	1	12555300		○
12580400	2	12575600	1	12575600				○
12575600	2	12580400	1	12580400		○	○	○
12582301	2	12582300	0	0
12582300	2	12582301	0	0
15000200	4	15000100, 15000000, 15000003	0	0
15000100	4	15000200, 15000000, 15000003	0	0
15000000	4	15000200, 15000100, 15000003	0	0
15000003	4	15000200, 15000100, 15000000	0	0
15001200	2	15001301	1	15001301
15001301	2	15001200	1	15001200		○	○
15005900	2	15005800	1	15005800
15005800	2	15005900	1	15005900		○	○
15012800	2	15012900	1	15012900		○	○
15012900	2	15012800	1	15012800		○	○
15012601	2	15012500	0	0
15012500	2	15012601	0	0
15013700	5	15015200, 15014200, 15015201, 15005601	4	15015200, 15014200, 15015201, 15005601		○			○
15015200	5	15013700, 15014200, 15015201, 15005601	4	15013700, 15014200, 15015201, 15005601		○
15014200	5	15013700, 15015200, 15015201, 15005601	4	15013700, 15015200, 15015201, 15005601		○			○
15015201	5	15013700, 15015200, 15014200, 15005601	4	15013700, 15015200, 15014200, 15005601		○
15005601	5	15013700, 15015200, 15014200, 15015201	4	15013700, 15015200, 15014200, 15015201		○
15012600	2	15012501	1	15012501		○
15012501	2	15012600	1	15012600		○
15024700	2	15025800	1	15025800		○
15025800	2	15024700	1	15024700		○	○
15041801	2	15041800	1	15041800			○
15041800	2	15041801	1	15041801		○	○
15044800	2	15044500	1	15044500		○	○
15044500	2	15044800	1	15044800			○
15045900	2	15045700	1	15045700		○	○
15045700	2	15045900	1	15045900		○	○
15053100	3	15054100, 15053200	2	15054100, 15053200		○
15054100	3	15053100, 15053200	2	15053100, 15053200		○	○
15053200	3	15053100, 15054100	2	15053100, 15054100		○	○
15063401	3	15063800, 15063700	2	15063800, 15063700		○
15063800	3	15063401, 15063700	2	15063401, 15063700			○
15063700	3	15063401, 15063800	2	15063401, 15063800			○
15064300	2	15064100	0	0
15064100	2	15064300	0	0
15072100	2	15072201	1	15072201		○	○
15072201	2	15072100	1	15072100
15072200	2	15072000	1	15072000		○
15072000	2	15072200	1	15072200
15070700	2	15073600	1	15073600				○
15073600	2	15070700	1	15070700			○	○
15073500	2	15073400	1	15073400		○
15073400	2	15073500	1	15073500		○
15080300	2	15080700	1	15080700				○
15080700	2	15080300	1	15080300			○	○
15081100	2	15080500	1	15080500		○	○
15080500	2	15081100	1	15081100		○
15085400	2	15090001	1	15090001		○
15090001	2	15085400	1	15085400
15090000	2	15085300	1	15085300		○
15085300	2	15090000	1	15090000		○
15091300	2	15091100	1	15091100
15091100	2	15091300	1	15091300		○
15095701	2	15095700	1	15095700		○
15095700	2	15095701	1	15095701		○
15111300	2	15111400	0	0
15111400	2	15111300	0	0
15123200	2	15123400	1	15123400		○	○	○
15123400	2	15123200	1	15123200				○
15124400	3	15124901, 15124500	2	15124901, 15124500		○
15124901	3	15124400, 15124500	2	15124400, 15124500		○
15124500	3	15124400, 15124901	2	15124400, 15124901		○
15124001	2	15124000	1	15124000		○
15124000	2	15124001	1	15124001		○
15133600	3	15134700, 15133400	2	15134700, 15133400		○
15134700	3	15133600, 15133400	2	15133600, 15133400		○
15133400	3	15133600, 15134700	2	15133600, 15134700		○
15135800	3	15135900, 15135400	2	15135900, 15135400				○
15135900	3	15135800, 15135400	2	15135800, 15135400			○	○
15135400	3	15135800, 15135900	2	15135800, 15135900				○
15134500	2	15134200	0	0
15134200	2	15134500	0	0
15140100	2	no ID	1	no ID		○
no ID	2	15140100	1	15140100		○
15151801	2	15151800	1	15151800		○	○
15151800	2	15151801	1	15151801		○
15152400	2	15152401	1	15152401				○
15152401	2	15152400	1	15152400		○	○	○
15154900	2	15154600	0	0
15154600	2	15154900	0	0
15151901	2	15152600	1	15152600		○				○
15152600	2	15151901	1	15151901		○				○
15152000	2	15165100	0	0
15165100	2	15152000	0	0
15162400	3	15162900, 15163400	2	15162900, 15163400
15162900	3	15162400, 15163400	2	15162400, 15163400		○
15163400	3	15162400, 15162900	2	15162400, 15162900		○	○
15170201	3	15172700, no ID	2	15172700, no ID		○
15172700	3	15170201, no ID	2	15170201, no ID		○
no ID	3	15170201, 15172700	2	15170201, 15172700		○
15174000	2	15174301	1	15174301		○
15174301	2	15174000	1	15174000
15174500	2	15174400	1	15174400		○
15174400	2	15174500	1	15174500
15181100	2	15181600	0	0
15181600	2	15181100	0	0
15191000	2	15190900	1	15190900			○
15190900	2	15191000	1	15191000
15190800	2	no ID	1	no ID		○			○
no ID	2	15190800	1	15190800		○			○
15190100	2	15190001	0	0
15190001	2	15190100	0	0
15202800	3	15202900, 15203001	2	15202900, 15203001		○
15202900	3	15202800, 15203001	2	15202800, 15203001		○
15203001	3	15202800, 15202900	2	15202800, 15202900		○
15214300	4	15210500, 15203400, 15210800	3	15210500, 15203400, 15210800		○
15210500	4	15214300, 15203400, 15210800	3	15214300, 15203400, 15210800		○
15203400	4	15214300, 15210500, 15210800	3	15214300, 15210500, 15210800		○
15210800	4	15214300, 15210500, 15203400	3	15214300, 15210500, 15203400		○
15221600	2	15221501	0	0
15221501	2	15221600	0	0
15241800	2	15241700	1	15241700			○	○
15241700	2	15241800	1	15241800				○
15245700	2	15245500	1	15245500		○	○
15245500	2	15245700	1	15245700
15253900	2	15255000	1	15255000		○				○
15255000	2	15253900	1	15253900						○
15270302	2	15270500	0	0
15270500	2	15270302	0	0
15270000	2	15270501	0	0
15270501	2	15270000	0	0
15273700	2	15273900	1	15273900		○
15273900	2	15273700	1	15273700		○
15275400	2	15275700	1	15275700			○	○
15275700	2	15275400	1	15275400				○
15281401	2	15281800	1	15281800		○			○
15281800	2	15281401	1	15281401					○
15281300	2	15281500	1	15281500		○	○
15281500	2	15281300	1	15281300		○
15292400	3	15292401, 15292700	2	15292401, 15292700		○
15292401	3	15292400, 15292700	2	15292400, 15292700
15292700	3	15292400, 15292401	2	15292400, 15292401		○
15293400	5	15293100, 15293600, 15293300, 15295300	4	15293100, 15293600, 15293300, 15295300		○
15293100	5	15293400, 15293600, 15293300, 15295300	4	15293400, 15293600, 15293300, 15295300		○
15293600	5	15293400, 15293100, 15293300, 15295300	4	15293400, 15293100, 15293300, 15295300		○
15293300	5	15293400, 15293100, 15293600, 15295300	4	15293400, 15293100, 15293600, 15295300		○
15295300	5	15293400, 15293100, 15293600, 15293300	4	15293400, 15293100, 15293600, 15293300		○
15304200	2	15304300	1	15304300			○	○
15304300	2	15304200	1	15304200				○
15305601	2	15305600	0	0
15305600	2	15305601	0	0
15312100	3	15311700, 15312700	2	15311700, 15312700		○
15311700	3	15312100, 15312700	2	15312100, 15312700		○
15312700	3	15312100, 15311700	2	15312100, 15311700		○
15312002	3	15313400, 15313100	2	15313400, 15313100		○
15313400	3	15312002, 15313100	2	15312002, 15313100
15313100	3	15312002, 15313400	2	15312002, 15313400		○
15313500	2	15313701	1	15313701								子どもを抱いている。父
15313701	2	15313500	1	15313500		○						ベビーカーを押す。母。父ではなく、子どもと目を合わせている様子。
15312500	2	15313401	1	15313401		○
15313401	2	15312500	1	15312500		○
15320400	2	15320500	1	15320500		○
15320500	2	15320400	1	15320400
15322500	2	15322600	0	0
15322600	2	15322500	0	0
15320201	2	15325900	0	0
15325900	2	15320201	0	0
15343101	2	15343100	0	0
15343100	2	15343101	0	0
15334700	3	15341700, 15341600	2	15341700, 15341600				○
15341700	3	15334700, 15341600	2	15334700, 15341600				○
15341600	3	15334700, 15341700	2	15334700, 15341700				○
15354301	5	15353800, 15353900, 15354201, 15354000	4	15353800, 15353900, 15354201, 15354000		○	○	○
15353800	5	15354301, 15353900, 15354201, 15354000	4	15354301, 15353900, 15354201, 15354000				○
15353900	5	15354301, 15353800, 15354201, 15354000	4	15354301, 15353800, 15354201, 15354000			○	○
15354201	5	15354301, 15353800, 15353900, 15354000	4	15354301, 15353800, 15353900, 15354000				○
15354000	5	15354301, 15353800, 15353900, 15354201	4	15354301, 15353800, 15353900, 15354201				○
15355600	2	15355700	1	15355700		○	○
15355700	2	15355600	1	15355600		○
15361800	2	no ID	1	no ID		○
no ID	2	15361800	1	15361800
15361600	2	15361900	1	15361900				○
15361900	2	15361600	1	15361600			○	○
15370200	2	15365900	1	15365900		○
15365900	2	15370200	1	15370200		○
15380000	3	15375900, 15380300	2	15375900, 15380300		○	○
15375900	3	15380000, 15380300	2	15380000, 15380300			○
15380300	3	15380000, 15375900	2	15380000, 15375900		○	○
15381700	2	15382400	1	15382400		○	○		○
15382400	2	15381700	1	15381700
15384500	2	15384000	1	15384000					○
15384000	2	15384500	1	15384500					○
15382900	2	15384100	1	15384100					○
15384100	2	15382900	1	15382900					○
15320400	2	15390500	1	15390500
15390500	2	15320400	1	15320400		○
15394300	2	15394202	1	15394202		○
15394202	2	15394300	1	15394300		○
15400400	2	15400300	1	15400300
15400300	2	15400400	1	15400400		○	○
15420400	7	15420100, 15415500, 15420900, 15415501, 15415701, 15415900	2	15420100, 15415500		○	○
15420100	7	15420400, 15415500, 15420900, 15415501, 15415701, 15415900	2	15420400, 15415500		○
15415500	7	15420400, 15420100, 15420900, 15415501, 15415701, 15415900	2	15420400, 15420100		○
15420900	7	15420400, 15420100, 15415500, 15415501, 15415701, 15415900	1	15415501			○	○
15415501	7	15420400, 15420100, 15415500, 15420900, 15415701, 15415900	1	15420900				○
15415701	7	15420400, 15420100, 15415500, 15420900, 15415501, 15415900	1	15415900		○
15415900	7	15420400, 15420100, 15415500, 15420900, 15415501, 15415701	1	15415701		○
15423700	2	15422502	1	15422502			○	○
15422502	2	15423700	1	15423700				○
15422400	2	15420700	1	15420700		○				○
15420700	2	15422400	1	15422400		○				○
15425300	2	15424300	1	15424300		○
15424300	2	15425300	1	15425300		○
15440600	3	15440700, 15440801	2	15440700, 15440801		○
15440700	3	15440600, 15440801	2	15440600, 15440801		○
15440801	3	15440600, 15440700	2	15440600, 15440700		○
15442400	2	15442500	0	0
15442500	2	15442400	0	0
15440901	2	15440800	1	15440800		○
15440800	2	15440901	1	15440901		○	○
15451900	2	15452000	1	15452000		○
15452000	2	15451900	1	15451900		○
15453900	2	15453700	1	15453700		○
15453700	2	15453900	1	15453900		○
15454500	3	15454201, 15454400	2	15454201, 15454400		○
15454201	3	15454500, 15454400	2	15454500, 15454400		○
15454400	3	15454500, 15454201	2	15454500, 15454201		○
15465300	2	15465200	1	15465200		○
15465200	2	15465300	1	15465300		○
15473300	2	15473402	1	15473402
15473402	2	15473300	1	15473300		○
15475200	2	15473401	1	15473401		○
15473401	2	15475200	1	15475200		○
15501100	2	15500402	1	15500402				○		○
15500402	2	15501100	1	15501100				○		○
15501300	2	15491800	1	15491800		○
15491800	2	15501300	1	15501300		○
15512901	2	15512600	1	15512600
15512600	2	15512901	1	15512901			○
15505900	2	15510200	1	15510200		○
15510200	2	15505900	1	15505900		○
15531200	2	15525901	0	0
15525901	2	15531200	0	0
15531602	2	15532700	0	0
15532700	2	15531602	0	0
15524400	4	15530100, 15525700, 15530000	3	15530100, 15525700, 15530000		○
15530100	4	15524400, 15525700, 15530000	3	15524400, 15525700, 15530000		○
15525700	4	15524400, 15530100, 15530000	3	15524400, 15530100, 15530000		○
15530000	4	15524400, 15530100, 15525700	3	15524400, 15530100, 15525700		○
15534900	2	15535600	1	15535600		○
15535600	2	15534900	1	15534900		○
15561200	3	15560400, 15560900	0	0
15560400	3	15561200, 15560900	0	0
15560900	3	15561200, 15560400	0	0
15565400	2	15565700	1	15565700		○
15565700	2	15565400	1	15565400
15572900	2	15572500	1	15572500					○
15572500	2	15572900	1	15572900					○
15570600	2	15570400	1	15570400
15570400	2	15570600	1	15570600		○
15591100	2	15591101	1	15591101		○
15591101	2	15591100	1	15591100		○
19013300	2	19013501	0	0
19013501	2	19013300	0	0
19013600	2	19021300	1	19021300		○
19021300	2	19013600	1	19013600
19021400	2	19022300	1	19022300		○
19022300	2	19021400	1	19021400
19043700	2	19044300	1	19044300					○
19044300	2	19043700	1	19043700					○
19052200	2	19052100	1	19052100		○
19052100	2	19052200	1	19052200		○
19054000	3	19052900, 19052201	2	19052900, 19052201		○
19052900	3	19054000, 19052201	2	19054000, 19052201		○
19052201	3	19054000, 19052900	2	19054000, 19052900		○
19065700	2	19070300	1	19070300		○
19070300	2	19065700	1	19065700
19075900	2	no ID	1	no ID					○
no ID	2	19075900	1	19075900					○
19082301	2	19082600	1	19082600		○
19082600	2	19082301	1	19082301		○
19092000	2	19092100	1	19092100				○
19092100	2	19092000	1	19092000			○	○
19140701	2	no ID	1	no ID					○
no ID	2	19140701	1	19140701					○
19141201	2	19141200	1	19141200		○
19141200	2	19141201	1	19141201		○
19133500	3	19135300, 19135500	2	19135300, 19135500		○
19135300	3	19133500, 19135500	2	19133500, 19135500		○
19135500	3	19133500, 19135300	2	19133500, 19135300
19140100	3	19140600, 19140700	2	19140600, 19140700		○
19140600	3	19140100, 19140700	2	19140100, 19140700		○
19140700	3	19140100, 19140600	2	19140100, 19140600		○	○
19174800	2	19175000	1	19175000		○	○
19175000	2	19174800	1	19174800
19183300	2	19183500	1	19183500			○
19183500	2	19183300	1	19183300		○
19233201	2	19233200	1	19233200		○
19233200	2	19233201	1	19233201		○
19235500	2	19235300	1	19235300		○
19235300	2	19235500	1	19235500		○
19260100	2	no ID	1	no ID		○			○
no ID	2	19260100	1	19260100		○			○
19270000	2	19265902	1	19265902		○
19265902	2	19270000	1	19270000		○
19264600	2	19264700	0	0
19264700	2	19264600	0	0
19275100	2	19274400	1	19274400		○	○
19274400	2	19275100	1	19275100		○
19282100	3	19281900, 19282000	2	19281900, 19282000		○
19281900	3	19282100, 19282000	2	19282100, 19282000
19282000	3	19282100, 19281900	2	19282100, 19281900		○
19302300	2	19302100	1	19302100		○
19302100	2	19302300	1	19302300		○
19314301	2	19314300	1	19314300		○
19314300	2	19314301	1	19314301		○
19322600	2	19322800	1	19322800		○
19322800	2	19322600	1	19322600		○
19321800	2	19322000	1	19322000				○
19322000	2	19321800	1	19321800			○	○
19333000	2	19333100	0	0
19333100	2	19333000	0	0
19340000	2	19335901	1	19335901						○		一人が急に方向を変えて店に入り、もう一人がそれに気づいて追っていった。
19335901	2	19340000	1	19340000						○		一人が急に方向を変えて店に入り、もう一人がそれに気づいて追っていった。
19351300	2	19351100	1	19351100		○
19351100	2	19351300	1	19351300		○
19371000	2	19364300	0	0
19364300	2	19371000	0	0
19372500	2	19372501	1	19372501			○
19372501	2	19372500	1	19372500		○	○
19420100	2	no ID	1	no ID		○
no ID	2	19420100	1	19420100		○
19475300	2	19475200	1	19475200						○
19475200	2	19475300	1	19475300		○				○
19471901	2	19501700	1	19501700		○
19501700	2	19471901	1	19471901		○
19512901	4	19513000, 19521100, 19512900	3	19513000, 19521100, 19512900		○			○
19513000	4	19512901, 19521100, 19512900	3	19512901, 19521100, 19512900		○
19521100	4	19512901, 19513000, 19512900	3	19512901, 19513000, 19512900		○			○
19512900	4	19512901, 19513000, 19521100	3	19512901, 19513000, 19521100		○			○
19533600	2	19535700	1	19535700		○	○
19535700	2	19533600	1	19533600		○
19583801	2	19583800	1	19583800		○
19583800	2	19583801	1	19583801		○
19584600	2	19584200	1	19584200		○			○
19584200	2	19584600	1	19584600		○	○		○
19594100	3	19593500, 19594200	2	19593500, 19594200		○
19593500	3	19594100, 19594200	2	19594100, 19594200		○
19594200	3	19594100, 19593500	2	19594100, 19593500		○
