# Supplementary material for: Intrinsic group behaviour II: On the dependence of triad spatial dynamics on social and personal features; and on the effect of social interaction on small group dynamics
Source: PLOS journal article supplement (doi:10.1371/journal.pone.0225704), 2019-12-03
Supplement: S5 (10.1371/journal.pone.0225704.s005) [file journal.pone.0225704.s005]

| 歩行者ID<br>(pedestrian<br>ID) | Gサイズ<br>(group size) | 同行ID<br>(partner ID) | 相手サイズ<br>(number of<br>interaction<br>partners) | 相手ID<br>(interaction<br>partner ID) | 備考 (notes) | 視線:<br>相手を見た<br>(gaze:<br>watched the<br>partner) | 会話中にし<br>か出ないよう<br>な身振り、口<br>の動きがあ<br>った<br>(behaviours<br>seen only<br>during<br>conversation<br>, such as<br>moving the<br>mouth) | 視線:<br>同じ方向を<br>見た (gaze:<br>watched in<br>the same<br>direction) | フィジカル<br>コンタクト<br>(physical<br>contact) | その他<br>(other) | 判断つかず<br>(根拠はない<br>けど会話して<br>いるように見<br>える) (not<br>used: looks<br>like they are<br>having a<br>conversation<br>but it is<br>impossible to<br>judge) | メモ (notes) |
|-----------------------------|----------------------|----------------------|-------------------------------------------------|-------------------------------------|------------|---------------------------------------------------|-------------------------------------------------------------------------------------------------------------------------------------|-------------------------------------------------------------------|-----------------------------------------|----------------|-----------------------------------------------------------------------------------------------------------------------------------------------------|------------|
| 10050100                    | 2                    | 10045500             | 1                                               | 10045500                            |            | ○                                                 | ○                                                                                                                                   |                                                                   |                                         |                |                                                                                                                                                     |            |
| 10045500                    | 2                    | 10050100             | 1                                               | 10050100                            |            | ○                                                 |                                                                                                                                     |                                                                   |                                         |                |                                                                                                                                                     |            |
| 10061100                    | 2                    | 10063001             | 1                                               | 10063001                            |            | ○                                                 |                                                                                                                                     |                                                                   |                                         |                |                                                                                                                                                     |            |
| 10063001                    | 2                    | 10061100             | 1                                               | 10061100                            |            |                                                   |                                                                                                                                     |                                                                   |                                         |                |                                                                                                                                                     |            |
| 10093200                    | 2                    | 10100800             | 1                                               | 10100800                            |            | ○                                                 |                                                                                                                                     |                                                                   |                                         |                |                                                                                                                                                     |            |
| 10100800                    | 2                    | 10093200             | 1                                               | 10093200                            |            |                                                   |                                                                                                                                     |                                                                   |                                         |                |                                                                                                                                                     |            |
| 10140500                    | 2                    | 10140400             | 1                                               | 10140400                            |            | ○                                                 |                                                                                                                                     |                                                                   |                                         | ○              |                                                                                                                                                     |            |
| 10140400                    | 2                    | 10140500             | 1                                               | 10140500                            |            | ○                                                 |                                                                                                                                     |                                                                   |                                         | ○              |                                                                                                                                                     |            |
| 10191700                    | 2                    | 10191501             | 1                                               | 10191501                            |            | ○                                                 |                                                                                                                                     |                                                                   |                                         |                |                                                                                                                                                     |            |
| 10191501                    | 2                    | 10191700             | 1                                               | 10191700                            |            | ○                                                 |                                                                                                                                     |                                                                   |                                         |                |                                                                                                                                                     |            |
| 10182000                    | 2                    | no ID                | 1                                               | no ID                               |            | ○                                                 |                                                                                                                                     |                                                                   |                                         | ○              |                                                                                                                                                     |            |
| no ID                       | 2                    | 10182000             | 1                                               | 10182000                            |            | ○                                                 |                                                                                                                                     |                                                                   |                                         | ○              |                                                                                                                                                     |            |
| 10202000                    | 2                    | 10202100             | 1                                               | 10202100                            |            |                                                   | ○                                                                                                                                   |                                                                   |                                         |                |                                                                                                                                                     |            |
| 10202100                    | 2                    | 10202000             | 1                                               | 10202000                            |            | ○                                                 |                                                                                                                                     |                                                                   |                                         |                |                                                                                                                                                     |            |
| 10211200                    | 2                    | 10211600             | 0                                               | 0                                   |            |                                                   |                                                                                                                                     |                                                                   |                                         |                |                                                                                                                                                     |            |
| 10211600                    | 2                    | 10211200             | 0                                               | 0                                   |            |                                                   |                                                                                                                                     |                                                                   |                                         |                |                                                                                                                                                     |            |
| 10221800                    | 3                    | 10204500,            | 2                                               | 10204500, 10222000                  |            | ○                                                 | ○                                                                                                                                   |                                                                   |                                         |                |                                                                                                                                                     |            |
| 10204500                    | 3                    | 10221800,            | 2                                               | 10221800, 10222000                  |            | ○                                                 | ○                                                                                                                                   |                                                                   |                                         |                |                                                                                                                                                     |            |
| 10222000                    | 3                    | 10221800,            | 2                                               | 10221800, 10204500                  |            | ○                                                 | ○                                                                                                                                   |                                                                   |                                         |                |                                                                                                                                                     |            |
| 10244900                    | 2                    | 10245101             | 0                                               | 0                                   |            |                                                   |                                                                                                                                     |                                                                   |                                         |                |                                                                                                                                                     |            |
| 10245101                    | 2                    | 10244900             | 0                                               | 0                                   |            |                                                   |                                                                                                                                     |                                                                   |                                         |                |                                                                                                                                                     |            |
| 10251900                    | 3                    | 10251700,            | 0                                               | 0                                   |            |                                                   |                                                                                                                                     |                                                                   |                                         |                |                                                                                                                                                     |            |
| 10251700                    | 3                    | 10251900,            | 0                                               | 0                                   |            |                                                   |                                                                                                                                     |                                                                   |                                         |                |                                                                                                                                                     |            |
| 10251902                    | 3                    | 10251900,            | 0                                               | 0                                   |            |                                                   |                                                                                                                                     |                                                                   |                                         |                |                                                                                                                                                     |            |
| 10251400                    | 2                    | 10252800             | 1                                               | 10252800                            |            | ○                                                 | ○                                                                                                                                   |                                                                   |                                         | ○              |                                                                                                                                                     |            |
| 10252800                    | 2                    | 10251400             | 1                                               | 10251400                            |            | ○                                                 |                                                                                                                                     |                                                                   |                                         | ○              |                                                                                                                                                     |            |
| 10214900                    | 2                    | 10233500             | 1                                               | 10233500                            |            | ○                                                 | ○                                                                                                                                   |                                                                   |                                         |                |                                                                                                                                                     |            |
| 10233500                    | 2                    | 10214900             | 1                                               | 10214900                            |            |                                                   |                                                                                                                                     |                                                                   |                                         |                |                                                                                                                                                     |            |
| 10280001                    | 2                    | 10275200             | 0                                               | 0                                   |            |                                                   |                                                                                                                                     |                                                                   |                                         |                |                                                                                                                                                     |            |
| 10275200                    | 2                    | 10280001             | 0                                               | 0                                   |            |                                                   |                                                                                                                                     |                                                                   |                                         |                |                                                                                                                                                     |            |
| 10294900                    | 2                    | 10294700             | 1                                               | 10294700                            |            | ○                                                 |                                                                                                                                     |                                                                   |                                         |                |                                                                                                                                                     |            |
| 10294700                    | 2                    | 10294900             | 1                                               | 10294900                            |            |                                                   |                                                                                                                                     |                                                                   |                                         |                |                                                                                                                                                     |            |
| 10322100                    | 2                    | 10322701             | 0                                               | 0                                   |            |                                                   |                                                                                                                                     |                                                                   |                                         |                |                                                                                                                                                     |            |
| 10322701                    | 2                    | 10322100             | 0                                               | 0                                   |            |                                                   |                                                                                                                                     |                                                                   |                                         |                |                                                                                                                                                     |            |
| 10341600                    | 2                    | 10341700             | 1                                               | 10341700                            |            | ○                                                 |                                                                                                                                     |                                                                   |                                         |                |                                                                                                                                                     |            |
| 10341700                    | 2                    | 10341600             | 1                                               | 10341600                            |            | ○                                                 |                                                                                                                                     |                                                                   |                                         |                |                                                                                                                                                     |            |
| 10363000                    | 2                    | 10362900             | 1                                               | 10362900                            |            |                                                   |                                                                                                                                     | ○                                                                 |                                         |                |                                                                                                                                                     |            |
| 10362900                    | 2                    | 10363000             | 1                                               | 10363000                            |            |                                                   | ○                                                                                                                                   | ○                                                                 |                                         |                |                                                                                                                                                     |            |
| 10382601                    | 2                    | 10383800             | 1                                               | 10383800                            |            |                                                   | ○                                                                                                                                   | ○                                                                 |                                         |                |                                                                                                                                                     |            |
| 10383800                    | 2                    | 10382601             | 1                                               | 10382601                            |            |                                                   |                                                                                                                                     | ○                                                                 |                                         |                |                                                                                                                                                     |            |
| 10403500                    | 2                    | 10403800             | 1                                               | 10403800                            |            |                                                   |                                                                                                                                     |                                                                   | ○                                       |                |                                                                                                                                                     |            |
| 10403800                    | 2                    | 10403500             | 1                                               | 10403500                            |            |                                                   |                                                                                                                                     |                                                                   |                                         |                |                                                                                                                                                     |            |
| 10403100                    | 2                    | 10405300             | 0                                               | 0                                   |            |                                                   |                                                                                                                                     |                                                                   |                                         |                |                                                                                                                                                     |            |
| 10405300                    | 2                    | 10403100             | 0                                               | 0                                   |            |                                                   |                                                                                                                                     |                                                                   |                                         |                |                                                                                                                                                     |            |
| 10414300                    | 2                    | 10414000             | 1                                               | 10414000                            |            |                                                   |                                                                                                                                     |                                                                   | ○                                       |                |                                                                                                                                                     |            |
| 10414000                    | 2                    | 10414300             | 1                                               | 10414300                            |            |                                                   |                                                                                                                                     |                                                                   | ○                                       |                |                                                                                                                                                     |            |
| 10420101                    | 4                    | 10420103,            | 0                                               | 0                                   |            |                                                   |                                                                                                                                     |                                                                   |                                         |                |                                                                                                                                                     |            |
| 10420103                    | 4                    | 10420101,            | 0                                               | 0                                   |            |                                                   |                                                                                                                                     |                                                                   |                                         |                |                                                                                                                                                     |            |
| 10420300                    | 4                    | 10420101,            | 1                                               | 10420400                            |            | ○                                                 |                                                                                                                                     |                                                                   |                                         |                |                                                                                                                                                     |            |
| 10420400                    | 4                    | 10420101,            | 1                                               | 10420300                            |            |                                                   |                                                                                                                                     |                                                                   |                                         |                |                                                                                                                                                     |            |
| 10445801                    | 3                    | 10442300,            | 2                                               | 10442300, 10442800                  |            | ○                                                 |                                                                                                                                     |                                                                   |                                         |                |                                                                                                                                                     |            |
| 10442300                    | 3                    | 10445801,            | 2                                               | 10445801, 10442800                  |            | ○                                                 |                                                                                                                                     |                                                                   | ○                                       |                |                                                                                                                                                     |            |

|          |             |                      |   |   |   |   |
|----------|-------------|----------------------|---|---|---|---|
| 10442800 | 3 10445801, | 2 10445801, 10442300 | ○ |   |   |   |
| 10444900 | 2 10444800  | 0 0                  |   |   |   |   |
| 10444800 | 2 10444900  | 0 0                  |   |   |   |   |
| 10465201 | 2 10465103  | 1 10465103           | ○ |   |   |   |
| 10465103 | 2 10465201  | 1 10465201           |   |   |   |   |
| 10465102 | 2 10465200  | 1 10465200           | ○ |   |   |   |
| 10465200 | 2 10465102  | 1 10465102           | ○ |   |   |   |
| 10473400 | 3 10473300, | 1 10473300           | ○ |   | ○ | ○ |
| 10473300 | 3 10473400, | 2 10473400, 10464900 | ○ |   | ○ | ○ |
| 10464900 | 3 10473400, | 1 10473300           |   |   | ○ |   |
| 10464901 | 3 10471400, | 2 10471400, 10464400 |   | ○ | ○ |   |
| 10471400 | 3 10464901, | 2 10464901, 10464400 |   |   | ○ |   |
| 10464400 | 3 10464901, | 2 10464901, 10471400 |   |   | ○ |   |
| 10472100 | 2 10472200  | 0 0                  |   |   |   |   |
| 10472200 | 2 10472100  | 0 0                  |   |   |   |   |
| 10481201 | 2 10481600  | 1 10481600           | ○ |   |   |   |
| 10481600 | 2 10481201  | 1 10481201           |   |   |   |   |
| 10491400 | 2 10491500  | 1 10491500           | ○ | ○ |   |   |
| 10491500 | 2 10491400  | 1 10491400           |   |   |   |   |
| 10534301 | 5 10534300, | 1 10534300           | ○ | ○ |   |   |
| 10534300 | 5 10534301, | 1 10534301           |   |   |   |   |
| 10534500 | 5 10534301, | 0 0                  |   |   |   |   |
| 10534401 | 5 10534301, | 0 0                  |   |   |   |   |
| 10534400 | 5 10534301, | 0 0                  |   |   |   |   |
| 10552100 | 2 10552600  | 1 10552600           | ○ |   |   |   |
| 10552600 | 2 10552100  | 1 10552100           | ○ |   |   |   |
| 10553100 | 2 10552900  | 1 10552900           | ○ |   |   |   |
| 10552900 | 2 10553100  | 1 10553100           |   |   |   |   |
| 10560202 | 2 10560400  | 1 10560400           |   |   |   |   |
| 10560400 | 2 10560202  | 1 10560202           | ○ | ○ |   |   |
| 10564000 | 2 10563700  | 0 0                  |   |   |   |   |
| 10563700 | 2 10564000  | 0 0                  |   |   |   |   |
| 10551100 | 2 10560201  | 1 10560201           | ○ | ○ |   |   |
| 10560201 | 2 10551100  | 1 10551100           | ○ |   |   |   |
| 10570702 | 2 10570701  | 1 10570701           |   |   | ○ |   |
| 10570701 | 2 10570702  | 1 10570702           |   |   | ○ |   |
| 10575500 | 2 10572500  | 1 10572500           | ○ |   | ○ | ○ |
| 10572500 | 2 10575500  | 1 10575500           | ○ |   | ○ | ○ |
| 10580300 | 2 10575400  | 1 10575400           |   |   | ○ | ○ |
| 10575400 | 2 10580300  | 1 10580300           |   |   | ○ | ○ |
| 12005700 | 2 12005600  | 1 12005600           | ○ |   |   |   |
| 12005600 | 2 12005700  | 1 12005700           | ○ |   |   |   |
| 12015500 | 2 12015300  | 1 12015300           |   |   |   |   |
| 12015300 | 2 12015500  | 1 12015500           |   | ○ |   |   |
| 12024200 | 2 12023800  | 1 12023800           | ○ |   |   |   |
| 12023800 | 2 12024200  | 1 12024200           | ○ |   |   |   |
| 11583000 | 2 12024900  | 1 12024900           | ○ |   |   |   |
| 12024900 | 2 11583000  | 1 11583000           | ○ |   |   |   |
| 12025200 | 2 12025100  | 1 12025100           | ○ | ○ |   |   |
| 12025100 | 2 12025200  | 1 12025200           | ○ |   |   |   |
| 12040200 | 2 12040500  | 1 12040500           |   | ○ |   |   |
| 12040500 | 2 12040200  | 1 12040200           |   | ○ | ○ |   |
| 12041400 | 2 12041200  | 1 12041200           | ○ |   |   |   |
| 12041200 | 2 12041400  | 1 12041400           | ○ |   |   |   |
| 12042500 | 2 12042200  | 1 12042200           |   |   |   |   |
| 12042200 | 2 12042500  | 1 12042500           | ○ | ○ |   |   |
| 12024600 | 2 11583200  | 1 11583200           | ○ | ○ |   |   |
| 11583200 | 2 12024600  | 1 12024600           | ○ |   |   |   |
| 12050000 | 2 12045500  | 1 12045500           | ○ | ○ |   |   |
| 12045500 | 2 12050000  | 1 12050000           |   |   |   |   |

先に店に入
